# Supplementary material for: Behavioral correlates of semi-zygodactyly in Ospreys (Pandion haliaetus) based on analysis of internet images
Source: PeerJ. 2019 Feb 5;7:e6243. doi: 10.7717/peerj.6243 (PMC6368007; doi:10.7717/peerj.6243)
Supplement: Supplemental Information 2 [file peerj-07-6243-s002.xlsx]

## Sheet: OspreyData
OriginalImageID	ImageIDnumber	ImageFolderID	FootIdentity	Footing	ContactCond	GraspScen	ToeConfig	ObjectSize
_DSC2370_20	1.0	FF	left	2	F	G	3	1
_DSC2370_20	1.0	FF	right	2	F	G	3	2
_MG_2649cropped	2.0	FF	left	2	F	G	3	1
_MG_2649cropped	2.0	FF	right	2	F	G	3	2
02_P_hal_Viduetskiy	3.0	FF	left	2	F	G	3	1
02_P_hal_Viduetskiy	3.0	FF	right	2	F	G	3	1
2 16 12 osprey landing4	4.0	FF	left	1	0	0	1	0
2 16 12 osprey landing4	4.0	FF	right	1	F	G	1	1
2i589y	5.0	FF	left	2	F	G	2	2
2i589y	5.0	FF	right	2	F	G	1	2
2om9NFi67L26tS1	6.0	FF	left	2	F	G	1	1
2om9NFi67L26tS1	6.0	FF	right	2	F	G	1	1
3_1082-th1b	7.0	FF	right	1	0	0	1	0
3_1082-th1b	7.0	FF	left	1	F	G	3	1
3ed081c6727963c25d2814ddae49f4ec	8.0	FF	left	2	F	G	1	1
3ed081c6727963c25d2814ddae49f4ec	8.0	FF	right	2	F	G	3	1
5_-_BALBUZARD_PCHEUR__D	9.0	FF	left	2	F	G	1	1
5_-_BALBUZARD_PCHEUR__D	9.0	FF	right	2	F	G	3	1
6_-_BALBUZARD_PCHEUR_	10.0	FF	left	2	F	G	2	2
6_-_BALBUZARD_PCHEUR_	10.0	FF	right	2	F	G	3	2
8.0000000000000002E-3	11.0	FF	left	2	F	G	1	1
8.0000000000000002E-3	11.0	FF	right	2	F	G	3	2
8Osprey	12.0	FF	right	1	F	G	1	2
8Ospreywithfish_zpsa7b52ba3	13.0	FF	left	1	0	0	3	0
8Ospreywithfish_zpsa7b52ba3	13.0	FF	right	1	F	G	3	2
12-350x289	14.0	FF	left	2	F	G	3	2
12-350x289	14.0	FF	right	2	F	G	3	2
1.6E-2	15.0	FF	left	2	F	G	1	2
20	16.0	FF	left	2	F	G	1	1
20	16.0	FF	right	2	F	G	1	1
2.1000000000000001E-2	17.0	FF	left	2	F	G	3	2
2.1000000000000001E-2	17.0	FF	right	2	F	G	3	2
46	18.0	FF	right	2	F	G	2	2
50	20.0	FF	right	1	0	0	1	0
50	20.0	FF	left	1	F	G	3	2
53	22.0	FF	right	1	0	0	1	0
53	22.0	FF	left	1	F	G	3	2
61	23.0	FF	left	2	F	G	3	2
61	23.0	FF	right	2	F	G	2	2
312	24.0	FF	right	1	0	0	1	0
312	24.0	FF	left	1	F	G	3	2
319	25.0	FF	right	1	0	0	1	0
319	25.0	FF	left	1	F	G	3	2
787(mikerae)	26.0	FF	left	2	F	G	3	3
787(mikerae)	26.0	FF	right	2	F	G	1	3
788(mikerae)	27.0	FF	left	2	F	G	3	2
788(mikerae)	27.0	FF	right	2	F	G	1	2
789(mikerae)	28.0	FF	right	1	0	0	1	0
789(mikerae)	28.0	FF	left	1	F	G	3	2
790(mikerae)	29.0	FF	left	2	F	G	3	2
790(mikerae)	29.0	FF	right	2	F	G	3	2
791(mikerae)	30.0	FF	left	2	F	G	3	2
791(mikerae)	30.0	FF	right	2	F	G	2	2
794(mikerae)	31.0	FF	left	1	0	0	1	0
797(mikerae)	32.0	FF	left	2	F	G	3	2
797(mikerae)	32.0	FF	right	2	F	G	1	2
798(mikerae)	33.0	FF	left	2	F	G	3	2
798(mikerae)	33.0	FF	right	2	F	G	3	2
800(mikerae)	34.0	FF	left	2	F	G	1	1
800(mikerae)	34.0	FF	right	2	F	G	1	2
801(mikerae)	35.0	FF	right	1	0	0	1	0
801(mikerae)	35.0	FF	left	1	F	G	1	1
803(mikerae)	36.0	FF	right	1	0	0	1	0
803(mikerae)	36.0	FF	left	1	F	G	1	1
808(mikerae)	37.0	FF	left	2	F	G	1	2
808(mikerae)	37.0	FF	right	2	F	G	1	2
813(mikerae)	38.0	FF	left	2	F	G	3	2
813(mikerae)	38.0	FF	right	2	F	G	1	2
1008(mikerae)	39.0	FF	left	2	F	G	2	1
1008(mikerae)	39.0	FF	right	2	F	G	3	2
1009(mikerae)	40.0	FF	left	2	F	G	2	2
1010(mikerae)	41.0	FF	left	2	F	G	2	2
1011(mikerae)	42.0	FF	left	2	F	G	2	2
1011(mikerae)	42.0	FF	right	2	F	G	3	2
1024x768_DSC_1224	43.0	FF	left	1	0	0	1	0
1024x768_DSC_1224	43.0	FF	right	1	F	G	2	2
1270r	44.0	FF	left	2	F	G	3	2
1270r	44.0	FF	right	2	F	G	3	2
1631	45.0	FF	right	1	F	G	1	1
1631	45.0	FF	left	1	F	G	1	2
2007-03-24-13-01-54	46.0	FF	left	2	F	G	2	2
2007-03-24-13-01-54	46.0	FF	right	2	F	G	2	2
2010_07_18_IMG_9189	47.0	FF	left	2	F	G	3	2
2010_07_18_IMG_9189	47.0	FF	right	2	F	G	3	2
2010_07_18_IMG_9198	48.0	FF	right	1	0	0	1	0
2010_07_18_IMG_9198	48.0	FF	left	1	F	G	3	1
2010_07_18_IMG_9245	49.0	FF	right	0	F	G	1	1
4236l-balbuzard-pecheur-pandion-haliaetus	50.0	FF	left	1	F	G	3	2
6036.osprey	51.0	FF	right	1	0	0	1	0
6036.osprey	51.0	FF	left	1	F	G	3	1
6781	52.0	FF	left	2	F	G	3	1
6781	52.0	FF	right	2	F	G	3	1
21288_559740720715893_606238639_n(fb image)	53.0	FF	left	2	F	G	1	2
090604_20367Hornsby-Bend_filtered	54.0	FF	left	2	F	G	1	1
090604_20367Hornsby-Bend_filtered	54.0	FF	right	2	F	G	3	1
344154-le-balbuzard-pecheur-et-son-poisson	55.0	FF	left	2	F	G	3	2
344154-le-balbuzard-pecheur-et-son-poisson	55.0	FF	right	2	F	G	3	2
410938	56.0	FF	left	2	F	G	1	1
410938	56.0	FF	right	2	F	G	2	1
1455371_450_450_0_0_fit_6_84d76c360307555ce9e453d32661575c	57.0	FF	right	1	0	0	1	0
1455371_450_450_0_0_fit_6_84d76c360307555ce9e453d32661575c	57.0	FF	left	1	F	G	2	2
1743938_a585dacb	58.0	FF	left	2	F	G	1	1
1743938_a585dacb	58.0	FF	right	2	F	G	3	2
3298561_orig	59.0	FF	right	1	0	0	1	0
3298561_orig	59.0	FF	left	1	F	G	3	2
4270305	60.0	FF	left	2	F	G	1	2
5669525_orig	61.0	FF	right	1	0	0	1	0
5669525_orig	61.0	FF	left	1	F	G	1	1
5703018_orig	62.0	FF	left	1	0	0	3	0
5703018_orig	62.0	FF	right	1	F	G	3	2
6524767_orig	63.0	FF	left	1	0	0	1	0
6524767_orig	63.0	FF	right	1	F	G	3	2
6859565_orig	64.0	FF	right	1	0	0	3	0
6859565_orig	64.0	FF	left	1	F	G	3	2
7937046-md	65.0	FF	right	1	0	0	3	0
7937046-md	65.0	FF	left	1	F	G	1	2
7989380_orig	66.0	FF	right	2	F	G	1	2
20110118_05	67.0	FF	right	1	0	0	1	0
20110118_05	67.0	FF	left	1	F	G	2	1
20120421_6767-L	68.0	FF	right	1	0	0	3	0
20120421_6767-L	68.0	FF	left	1	F	G	3	2
20120515_9879-L	69.0	FF	left	1	0	0	1	0
20120515_9879-L	69.0	FF	right	1	F	G	3	1
20120719-7-19-12IMG_1111	70.0	FF	left	1	0	0	3	0
20120719-7-19-12IMG_1111	70.0	FF	right	1	F	G	3	1
71280681_1298755689_114	71.0	FF	left	2	F	G	3	2
71280681_1298755689_114	71.0	FF	right	2	F	G	1	3
87589100	72.0	FF	right	1	0	0	1	0
87589100	72.0	FF	left	1	F	G	2	2
603925335_uoCCp-L-1	73.0	FF	left	2	F	G	2	2
603925335_uoCCp-L-1	73.0	FF	right	2	F	G	1	2
2004364376	74.0	FF	right	1	0	0	1	0
2004364376	74.0	FF	left	1	F	G	3	2
7310166428_c8246f085f_z	75.0	FF	left	2	F	G	2	2
AA107052d_dyfi_ospreys	76.0	FF	right	1	0	0	1	0
AA107052d_dyfi_ospreys	76.0	FF	left	1	F	G	3	2
afs0049175-Osprey-Pandion-haliaetus-Finland	77.0	FF	left	1	0	0	1	0
afs0049175-Osprey-Pandion-haliaetus-Finland	77.0	FF	right	1	F	G	2	2
aguila	78.0	FF	right	1	0	0	1	0
aguila	78.0	FF	left	1	F	G	3	1
aguila2	79.0	FF	right	1	0	0	3	0
aguila2	79.0	FF	left	1	F	G	3	2
April17008	80.0	FF	right	1	0	0	1	0
April17008	80.0	FF	left	1	F	G	3	1
article-2035145-0DC45BF300000578-672_964x642(dailymail)	81.0	FF	left	1	0	0	1	0
article-2035145-0DC45BF300000578-672_964x642(dailymail)	81.0	FF	right	1	F	G	3	2
article-2035145-0DC45C2D00000578-906_964x641(dailymail)	82.0	FF	right	2	F	G	3	1
article-2035145-0DC45C2D00000578-906_964x641(dailymail)	82.0	FF	left	2	F	G	3	2
article-2035145-0DC45C9800000578-813_964x642(dailymail)	83.0	FF	right	1	F	G	3	2
article-2035145-0DC45D7D00000578-420_964x641(dailymail)	84.0	FF	left	2	F	G	1	1
article-2035145-0DC45D7D00000578-420_964x641(dailymail)	84.0	FF	right	2	F	G	1	1
away_MG_3845+copy-away_MG_3845 copy	85.0	FF	left	2	F	G	3	2
away_MG_3845+copy-away_MG_3845 copy	85.0	FF	right	2	F	G	3	3
b59fced530d2648affcc36233ad3fb86	86.0	FF	right	2	F	G	1	3
balbuzard.pecheur.relo.3g	87.0	FF	left	2	F	G	1	2
balbuzard.pecheur.relo.3g	87.0	FF	right	2	F	G	2	2
balbuzard-vol-poisson-tm1	88.0	FF	left	2	F	G	3	1
balbuzard-vol-poisson-tm1	88.0	FF	right	2	F	G	3	2
balbuzard-vol-poisson-tm2	89.0	FF	left	2	F	G	3	2
birdingmaine1	90.0	FF	left	2	F	G	2	1
birdingmaine1	90.0	FF	right	2	F	G	3	2
birdingmaine3	91.0	FF	right	2	F	G	3	1
birdingmaine3	91.0	FF	left	2	F	G	3	2
birdingmaine4	92.0	FF	left	1	F	G	1	2
birdingmaine4	92.0	FF	right	1	F	G	3	2
birdswesee	93.0	FF	left	2	F	G	1	2
birdswesee	93.0	FF	right	2	F	G	3	2
birgingmaine2	94.0	FF	left	2	F	G	3	2
birgingmaine2	94.0	FF	right	2	F	G	3	2
blogpost_58_osprey	95.0	FF	left	2	F	G	3	2
blogpost_144_osprey_2013_1.2	96.0	FF	right	2	F	G	3	2
blogpost_145_osprey_2013_2	97.0	FF	left	2	F	G	2	1
blogpost_145_osprey_2013_2	97.0	FF	right	2	F	G	1	2
blogpost_163_osprey2F	98.0	FF	left	1	F	G	3	2
blogpost_163_osprey2F	98.0	FF	right	1	F	G	3	2
blogpost_164_osprey_F	99.0	FF	left	2	F	G	1	2
blogpost_164_osprey_F	99.0	FF	right	2	F	G	3	2
blogpost_165_osprey_F	100.0	FF	left	2	F	G	1	2
blogpost_165_osprey_F	100.0	FF	right	2	F	G	3	2
Chobe_2011	101.0	FF	right	1	0	0	1	0
Chobe_2011	101.0	FF	left	1	F	G	3	1
D2X_4232	102.0	FF	left	2	F	G	3	3
D2X_4232	102.0	FF	right	2	F	G	1	3
D2X_4406	103.0	FF	left	2	F	G	1	1
D2X_4406	103.0	FF	right	2	F	G	1	1
delivery(wildbeat)	104.0	FF	left	2	F	G	3	1
delivery(wildbeat)	104.0	FF	right	2	F	G	3	1
dinner_MG_4328+copy-dinner_MG_4328 copy	105.0	FF	left	1	0	0	1	0
dinner_MG_4328+copy-dinner_MG_4328 copy	105.0	FF	right	1	F	G	1	2
download(2)	106.0	FF	left	1	0	0	1	0
download(2)	106.0	FF	right	1	F	G	3	1
download	107.0	FF	right	2	F	G	3	2
DPP_0013	108.0	FF	right	2	F	G	1	1
DPP_0013	108.0	FF	left	2	F	G	1	2
DPP_0015	109.0	FF	right	1	0	0	3	0
DPP_0015	109.0	FF	left	1	F	G	1	2
DSC_0003	110.0	FF	left	2	F	G	1	2
DSC_0790_zps4b1bd741	111.0	FF	right	1	0	0	1	0
DSC_0790_zps4b1bd741	111.0	FF	left	1	F	G	3	1
DSC_4608	112.0	FF	left	2	F	G	3	1
DSC_4608	112.0	FF	right	2	F	G	3	1
DSC0240_800w	113.0	FF	left	2	F	G	3	1
DSC0240_800w	113.0	FF	right	2	F	G	3	2
F52-662621	114.0	FF	left	1	0	0	1	0
F52-662621	114.0	FF	right	1	F	G	1	1
falconthief	115.0	FF	left	2	F	G	3	2
falconthief	115.0	FF	right	2	F	G	3	2
ff0214b7bc562af7f5ea53064e748a25	116.0	FF	left	2	F	G	3	2
ff0214b7bc562af7f5ea53064e748a25	116.0	FF	right	2	F	G	3	2
FishEaters_04(northshots)	117.0	FF	left	2	F	G	1	1
FishEaters_04(northshots)	117.0	FF	right	2	F	G	1	1
Fishing Run(scottevers)	118.0	FF	left	1	0	0	1	0
Fishing Run(scottevers)	118.0	FF	right	1	F	G	1	1
FishingOsprey	119.0	FF	left	2	F	G	3	3
FishingOsprey	119.0	FF	right	2	F	G	3	3
Fishnest	120.0	FF	right	1	0	0	1	0
Fishnest	120.0	FF	left	1	F	G	3	2
Fishnest2	121.0	FF	right	1	0	0	3	0
Fishnest2	121.0	FF	left	1	F	G	3	1
fli	122.0	FF	right	2	F	G	3	1
fli	122.0	FF	left	2	F	G	2	2
flic	123.0	FF	left	2	F	G	2	2
flic	123.0	FF	right	2	F	G	1	2
flic4	124.0	FF	left	2	F	G	3	1
flic4	124.0	FF	right	2	F	G	3	1
flick	125.0	FF	left	2	F	G	3	2
flick	125.0	FF	right	2	F	G	3	2
flickragain2	126.0	FF	right	2	F	G	1	1
flickragain2	126.0	FF	left	2	F	G	3	2
flickragain3	127.0	FF	left	1	0	0	1	0
flickragain3	127.0	FF	right	1	F	G	3	2
flickragain5	128.0	FF	left	2	F	G	3	3
flickragain5	128.0	FF	right	2	F	G	3	3
flickrcanada	129.0	FF	left	1	0	0	3	0
flickrcanada	129.0	FF	right	1	F	G	3	1
flickrosprey2	130.0	FF	right	1	0	0	1	0
flickrosprey2	130.0	FF	left	1	F	G	3	3
flickrospreypic	131.0	FF	right	2	F	G	1	1
flickrospreypic	131.0	FF	left	2	F	G	3	2
fliik	132.0	FF	left	2	F	G	3	2
fliik	132.0	FF	right	2	F	G	3	2
G83C6423-cropped-for-blog	133.0	FF	left	2	F	G	3	2
G83C6423-cropped-for-blog	133.0	FF	right	2	F	G	3	2
Getting airborn - an Osprey with a F by Paul Brewer	134.0	FF	right	2	F	G	1	1
glum-fish-2-as-smart-object-1	135.0	FF	right	1	F	G	3	1
Heron2a_9290_zps7ff1679c	136.0	FF	left	2	F	G	3	1
Heron2a_9290_zps7ff1679c	136.0	FF	right	2	F	G	3	1
hjfb73	137.0	FF	left	2	F	G	2	1
hjfb73	137.0	FF	right	2	F	G	3	2
Hunting_Osprey 750 2	138.0	FF	left	2	F	G	3	2
Hunting_Osprey 750 2	138.0	FF	right	2	F	G	3	2
Image00009	139.0	FF	left	1	0	0	3	0
images	140.0	FF	left	2	F	G	3	2
images	140.0	FF	right	2	F	G	3	2
IMG_1427	141.0	FF	left	1	0	0	1	0
IMG_1427	141.0	FF	right	1	F	G	3	1
IMG_1428	142.0	FF	left	1	0	0	1	0
IMG_1428	142.0	FF	right	1	F	G	3	1
IMG_1491_zps69567457	143.0	FF	left	2	F	G	3	1
IMG_1491_zps69567457	143.0	FF	right	2	F	G	3	1
IMG_4319(avithera)	144.0	FF	left	1	0	0	1	0
IMG_4319(avithera)	144.0	FF	right	1	F	G	3	1
IMG_4376_edited-1	145.0	FF	left	1	F	G	3	2
IMG_4376_edited-1	145.0	FF	right	1	F	G	3	2
IMG_4417_edited-1	146.0	FF	left	2	F	G	3	2
IMG_4417_edited-1	146.0	FF	right	2	F	G	3	2
IMG_4764_01	147.0	FF	right	2	F	G	3	2
IMG_5049	148.0	FF	right	2	F	G	3	1
IMG_5049	148.0	FF	left	2	F	G	1	2
IMG_5053	149.0	FF	right	2	F	G	1	1
IMG_5814-copy-Osprey-2008-w	150.0	FF	right	1	0	0	1	0
IMG_5814-copy-Osprey-2008-w	150.0	FF	left	1	F	G	3	1
IMG_6030	151.0	FF	left	2	F	G	3	2
IMG_6030	151.0	FF	right	2	F	G	3	2
IMG_6032	152.0	FF	left	2	F	G	3	2
IMG_6032	152.0	FF	right	2	F	G	3	3
IMG_7338	153.0	FF	right	1	0	0	1	0
IMG_7338	153.0	FF	left	1	F	G	1	2
IMG_7415	154.0	FF	right	1	0	0	3	0
IMG_7598	155.0	FF	left	2	F	G	1	1
IMG_7598	155.0	FF	right	2	F	G	3	1
IMG_7601	156.0	FF	left	1	0	0	3	0
IMG_7601	156.0	FF	right	1	F	G	3	1
IMG_7930-2	157.0	FF	left	2	F	G	1	1
IMG_8282	158.0	FF	left	2	F	G	3	1
IMG_8282	158.0	FF	right	2	F	G	1	2
img_8709foc_blog5(zeller)	159.0	FF	left	2	F	G	3	2
img_8709foc_blog5(zeller)	159.0	FF	right	2	F	G	3	2
IMG_348816x9crop	160.0	FF	right	2	F	G	1	1
IMG_348816x9crop	160.0	FF	left	2	F	G	3	2
img104	161.0	FF	left	2	F	G	3	2
img104	161.0	FF	right	2	F	G	3	2
jsvbha	162.0	FF	left	1	0	0	1	0
jukka2.hv_-350x264	163.0	FF	left	2	F	G	3	2
ospey+with+F_MG_4251+copy-ospey with F_MG_4251 copy	164.0	FF	right	2	F	G	3	1
ospey+with+F_MG_4251+copy-ospey with F_MG_4251 copy	164.0	FF	left	2	F	G	3	2
osp-fish(birdlight)	165.0	FF	right	2	F	G	3	2
ospreda	166.0	FF	left	2	F	G	2	2
ospreda	166.0	FF	right	2	F	G	3	2
osprey (1)(birdlight)	167.0	FF	right	1	0	0	3	0
Osprey (35)	168.0	FF	left	1	0	0	1	0
Osprey (35)	168.0	FF	right	1	F	G	3	2
Osprey 05 29 07 020	169.0	FF	right	2	F	G	3	1
Osprey 05 29 07 020	169.0	FF	left	2	F	G	1	2
Osprey with fish(stuart)	170.0	FF	left	2	F	G	1	2
Osprey with fish(stuart)	170.0	FF	right	2	F	G	2	3
osprey(5)	171.0	FF	left	2	F	G	3	2
osprey(5)	171.0	FF	right	2	F	G	1	2
osprey(10)	172.0	FF	left	2	F	G	3	2
osprey(10)	172.0	FF	right	2	F	G	3	2
Osprey(23)	173.0	FF	left	2	F	G	3	3
Osprey(23)	173.0	FF	right	2	F	G	3	3
osprey_1(outdoorlife)	174.0	FF	left	2	F	G	3	2
osprey_1(outdoorlife)	174.0	FF	right	2	F	G	3	2
osprey_3	175.0	FF	left	2	F	G	3	2
osprey_4(outdoorlife)	176.0	FF	right	2	F	G	3	2
osprey_4(outdoorlife)	176.0	FF	left	2	F	G	1	3
osprey_5(outdoorlife)	177.0	FF	left	2	F	G	1	2
osprey_6(outdoorlife)	178.0	FF	left	1	0	0	1	0
osprey_6(outdoorlife)	178.0	FF	right	1	F	G	3	1
osprey_6	179.0	FF	right	2	F	G	3	1
Osprey_08_JC_026	180.0	FF	right	2	F	G	3	2
osprey_8(outdoorlife)	181.0	FF	left	2	F	G	2	2
osprey_8(outdoorlife)	181.0	FF	right	2	F	G	1	2
osprey_9(outdoorlife)	182.0	FF	left	1	F	G	3	2
Osprey_9	183.0	FF	left	1	F	G	3	1
osprey_16(outdoorlife)	184.0	FF	right	1	0	0	1	0
osprey_16(outdoorlife)	184.0	FF	left	1	F	G	2	1
osprey_17(outdoorlife)	185.0	FF	left	1	F	G	3	1
osprey_17(outdoorlife)	185.0	FF	right	1	F	G	3	1
osprey_18(outdoorlife)	186.0	FF	left	2	F	G	3	2
osprey_18(outdoorlife)	186.0	FF	right	2	F	G	3	2
Osprey_75051	187.0	FF	right	2	F	G	2	2
osprey_fish(rickbethem)	188.0	FF	right	2	F	G	1	2
osprey_fish(rickbethem)	188.0	FF	left	2	F	G	3	3
osprey_fish_03_05-24	189.0	FF	left	1	0	0	3	0
Osprey_Fish_020510012copy	190.0	FF	left	2	F	G	3	2
Osprey_Fish_020510012copy	190.0	FF	right	2	F	G	3	2
osprey_flight_robert_burton_usfws	191.0	FF	left	2	F	G	3	2
osprey_flight_robert_burton_usfws	191.0	FF	right	2	F	G	3	2
Osprey_ID	192.0	FF	left	2	F	G	3	2
Osprey_ID	192.0	FF	right	2	F	G	1	2
Osprey_in_low-altitude_flight	193.0	FF	left	1	0	0	1	0
Osprey_in_low-altitude_flight	193.0	FF	right	1	F	G	3	1
Osprey_Lunch	194.0	FF	left	1	0	0	3	0
Osprey_Lunch	194.0	FF	right	1	F	G	3	2
Osprey_p25-7-145_l	195.0	FF	left	2	F	G	1	2
Osprey_p25-7-145_l	195.0	FF	right	2	F	G	1	2
osprey_pandion_haliaetus_finland_F52-662626	196.0	FF	left	1	0	0	1	0
osprey_pandion_haliaetus_finland_F52-662626	196.0	FF	right	1	F	G	1	1
osprey+with+F_MG_4252+copy-osprey with F_MG_4252 copy	197.0	FF	right	2	F	G	3	2
osprey+with+F_MG_4252+copy-osprey with F_MG_4252 copy	197.0	FF	left	2	F	G	3	3
osprey+with+F_MG_4258+copy-osprey with F_MG_4258 copy	198.0	FF	right	2	F	G	3	2
osprey+with+F_MG_4258+copy-osprey with F_MG_4258 copy	198.0	FF	left	2	F	G	3	3
Osprey1 (2)	199.0	FF	left	1	0	0	1	0
Osprey1 (2)	199.0	FF	right	1	F	G	3	1
osprey1	200.0	FF	left	1	0	0	1	0
osprey1	200.0	FF	right	1	F	G	3	1
osprey2 (2)	201.0	FF	left	2	F	G	3	2
osprey2(avainweb)	202.0	FF	left	1	0	0	3	0
osprey2(avainweb)	202.0	FF	right	1	F	G	3	1
osprey2	203.0	FF	left	1	0	0	1	0
osprey2	203.0	FF	right	1	F	G	3	1
osprey2_300x200	204.0	FF	left	2	F	G	1	2
osprey2_300x200	204.0	FF	right	2	F	G	1	2
Osprey2-1(2)	205.0	FF	left	1	0	0	1	0
Osprey2-1(2)	205.0	FF	right	1	F	G	3	1
osprey3	206.0	FF	left	1	0	0	1	0
osprey3	206.0	FF	right	1	F	G	3	1
osprey4	207.0	FF	left	1	0	0	1	0
osprey4	207.0	FF	right	1	F	G	3	1
osprey-4	208.0	FF	left	2	F	G	3	2
osprey-4	208.0	FF	right	2	F	G	1	2
osprey6a-10	209.0	FF	left	2	F	G	3	1
osprey-07E323	210.0	FF	left	2	F	G	3	2
osprey-07E323	210.0	FF	right	2	F	G	3	2
Osprey-08-11-07-1	211.0	FF	left	2	F	G	1	1
Osprey-08-11-07-1	211.0	FF	right	2	F	G	2	1
osprey8	212.0	FF	right	1	0	0	1	0
osprey8	212.0	FF	left	1	F	G	3	1
osprey9	213.0	FF	right	1	0	0	1	0
osprey9	213.0	FF	left	1	F	G	3	1
osprey11	214.0	FF	right	1	0	0	1	0
osprey11	214.0	FF	left	1	F	G	3	1
osprey-11	215.0	FF	left	2	F	G	1	2
osprey-11	215.0	FF	right	2	F	G	3	2
Osprey300dpi6_1_04	216.0	FF	right	1	0	0	3	0
Osprey300dpi6_1_04	216.0	FF	left	1	F	G	3	2
Osprey800n	217.0	FF	left	1	0	0	1	0
Osprey800n	217.0	FF	right	1	F	G	3	1
osprey-8505	218.0	FF	right	1	0	0	1	0
osprey-8505	218.0	FF	left	1	F	G	3	1
Osprey-090717-01	219.0	FF	right	1	0	0	1	0
Osprey-090717-01	219.0	FF	left	1	F	G	3	2
Osprey-20111227-DSC_0030	220.0	FF	left	1	0	0	3	0
osprey-bird-in-flight-close-up-pandion-haliaetus_w580_h725(mytakeontoday)	221.0	FF	right	2	F	G	3	2
OspreyCarambolinGoa2008-11-18_04-03(northwalesbirding)	222.0	FF	right	2	F	G	3	1
OspreyChickFeeding(avainweb)	223.0	FF	left	1	0	0	3	0
OspreyChickFeeding(avainweb)	223.0	FF	right	1	F	G	3	3
ospreycutoff	224.0	FF	right	1	0	0	1	0
ospreycutoff	224.0	FF	left	1	F	G	3	1
ospreyfeet8	225.0	FF	right	2	F	G	3	3
ospreyfeet9	226.0	FF	left	2	F	G	3	3
ospreyfeet9	226.0	FF	right	2	F	G	3	3
ospreyfeet10	227.0	FF	left	2	F	G	1	2
ospreyfeet10	227.0	FF	right	2	F	G	3	2
Ospreyfish(wildbeat)	228.0	FF	left	2	F	G	3	1
Ospreyfish(wildbeat)	228.0	FF	right	2	F	G	1	1
ospreyfish	229.0	FF	right	2	F	G	3	2
ospreyfish	229.0	FF	left	2	F	G	2	3
osprey-fish	230.0	FF	left	2	F	G	1	1
osprey-fish	230.0	FF	right	2	F	G	1	1
osprey-fish_1743895i(telegraphuk)	231.0	FF	left	1	0	0	1	0
osprey-fish_1743895i(telegraphuk)	231.0	FF	right	1	F	G	3	2
OspreyFish3_thumb1	232.0	FF	right	2	F	G	3	1
OspreyFish3_thumb1	232.0	FF	left	2	F	G	3	3
OspreyFish4_thumb1	233.0	FF	right	2	F	G	3	1
OspreyFish4_thumb1	233.0	FF	left	2	F	G	3	2
Osprey-fishing-Pandion-haliaetus-Balbuzard-pecheur-OSPR-CDODDS_11I4908	234.0	FF	left	1	0	0	1	0
Osprey-fishing-Pandion-haliaetus-Balbuzard-pecheur-OSPR-CDODDS_11I4908	234.0	FF	right	1	F	G	3	3
osprey-flaming-gorge-mia-mcpherson-4824	235.0	FF	left	1	0	0	1	0
osprey-flaming-gorge-mia-mcpherson-4824	235.0	FF	right	1	F	G	3	1
ospreyflickr	236.0	FF	right	1	0	0	1	0
ospreyflickr	236.0	FF	left	1	F	G	3	2
osprey-flight-with-fish-02(phillanoue)	237.0	FF	left	2	F	G	3	1
osprey-flight-with-fish-02(phillanoue)	237.0	FF	right	2	F	G	3	1
osprey-flight-with-fish-03(phillanoue)	238.0	FF	left	2	F	G	3	1
osprey-flight-with-fish-03(phillanoue)	238.0	FF	right	2	F	G	3	1
osprey-flight-with-fish-04(phillanoue)	239.0	FF	left	2	F	G	3	1
osprey-flight-with-fish-04(phillanoue)	239.0	FF	right	2	F	G	3	1
osprey-flight-with-fish-05(phillanoue)	240.0	FF	left	2	F	G	3	1
osprey-flight-with-fish-05(phillanoue)	240.0	FF	right	2	F	G	3	1
Osprey-flying-with-fish-2_rstrick(2)	241.0	FF	right	2	F	G	1	2
osprey-flying-with-fish-JFBR062310-59	242.0	FF	left	2	F	G	1	2
osprey-flying-with-fish-JFBR062310-59	242.0	FF	right	2	F	G	1	2
Osprey-in-flight-landing-with-sea-trout	243.0	FF	left	1	0	0	3	0
Osprey-in-flight-landing-with-sea-trout	243.0	FF	right	1	F	G	3	2
osprey-landing-flaming-gorge-mia-mcpherson-4829	244.0	FF	right	1	0	0	1	0
osprey-landing-flaming-gorge-mia-mcpherson-4829	244.0	FF	left	1	F	G	3	1
Osprey-Lands-a-Fishy-Lunc-020	245.0	FF	right	2	F	G	3	3
osprey-pike	246.0	FF	right	1	0	0	1	0
osprey-pike	246.0	FF	left	1	F	G	3	2
ospreys-nest-flaming-gorge-mia-mcpherson-4831	247.0	FF	left	1	F	G	3	1
ospreys-nest-flaming-gorge-mia-mcpherson-4831	247.0	FF	right	1	O	G	1	1
ospreys-nest-flaming-gorge-mia-mcpherson-4852	248.0	FF	right	1	0	0	1	0
ospreys-nest-flaming-gorge-mia-mcpherson-4852	248.0	FF	left	1	F	G	3	1
OspreytakingoffwithhisdinnerIinterruptedth	249.0	FF	right	1	0	0	3	0
OspreytakingoffwithhisdinnerIinterruptedth	249.0	FF	left	1	F	G	3	1
Osprey-w-fish-closeup-2-edi	250.0	FF	left	2	F	G	3	1
Osprey-w-fish-closeup--edit	251.0	FF	right	1	0	0	1	0
Osprey-w-fish-closeup--edit	251.0	FF	left	1	F	G	3	1
osprey-with-bass	252.0	FF	left	2	F	G	3	3
osprey-with-bass	252.0	FF	right	2	F	G	3	3
OspreywithFish	253.0	FF	right	1	0	0	1	0
OspreywithFish	253.0	FF	left	1	F	G	3	1
Ospreywithfish04	254.0	FF	left	2	F	G	3	1
Ospreywithfish04	254.0	FF	right	2	F	G	3	2
Osprey-with-fish--DSC04624-Edit_zps214c188c	255.0	FF	right	1	0	0	1	0
Osprey-with-fish--DSC04624-Edit_zps214c188c	255.0	FF	left	1	F	G	1	1
OspreyWithFishForward2	256.0	FF	left	2	F	G	1	3
OspreyWithFishForward2	256.0	FF	right	2	F	G	3	3
osprey-with-fish-watermarked	257.0	FF	left	2	F	G	3	2
osprey-with-fish-watermarked	257.0	FF	right	2	F	G	3	2
OspreywithFlyingFish	258.0	FF	left	2	F	G	1	1
OspreywithFlyingFish	258.0	FF	right	2	F	G	3	2
osprey-with-half-fish-vert_0235-copy-e1367408810498	259.0	FF	right	1	0	0	3	0
osprey-with-half-fish-vert_0235-copy-e1367408810498	259.0	FF	left	1	F	G	3	2
pescadora 2	260.0	FF	left	2	F	G	3	1
pescadora 2	260.0	FF	right	2	F	G	3	1
pescadora 4	261.0	FF	left	2	F	G	3	1
pescadora 7	262.0	FF	left	2	F	G	3	1
pescadora 7	262.0	FF	right	2	F	G	3	1
p-files-313233-76	263.0	FF	left	2	F	G	3	1
photos95-0078_3-balbuzard-pecheur-91	264.0	FF	left	1	0	0	1	0
photos95-0078_3-balbuzard-pecheur-91	264.0	FF	right	1	F	G	3	1
Picture-669	265.0	FF	right	2	F	G	1	1
Picture-669	265.0	FF	left	2	F	G	3	2
provraptors2	266.0	FF	left	2	F	G	3	3
provraptors2	266.0	FF	right	2	F	G	1	3
provraptors3	267.0	FF	left	2	F	G	1	2
provraptors3	267.0	FF	right	2	F	G	2	2
redbubble	268.0	FF	left	2	F	G	3	3
redbubble	268.0	FF	right	2	F	G	3	3
rolfnussbaumer	269.0	FF	left	2	F	G	3	2
rolfnussbaumer	269.0	FF	right	2	F	G	3	2
sandlake3	270.0	FF	right	1	0	0	3	0
sandlake3	270.0	FF	left	1	F	G	3	3
sazjtz	271.0	FF	right	1	0	0	1	0
sazjtz	271.0	FF	left	1	F	G	3	2
scoop19-as-smart-object-1-copy	272.0	FF	left	2	F	G	3	2
scoop19-as-smart-object-1-copy	272.0	FF	right	2	F	G	3	2
scoop20-as-smart-object-1	273.0	FF	left	2	F	G	3	1
scoop20-as-smart-object-1	273.0	FF	right	2	F	G	3	2
SeaEagleFishFilet-1	274.0	FF	left	2	F	G	1	1
SeaEagleFishFilet-1	274.0	FF	right	2	F	G	3	2
shetzers	275.0	FF	left	1	0	0	1	0
shetzers	275.0	FF	right	1	F	G	3	1
short	276.0	FF	right	1	0	0	1	0
short	276.0	FF	left	1	F	G	3	2
sized_E99B5479bw	277.0	FF	right	2	F	G	3	1
sized_E99B5479bw	277.0	FF	left	2	F	G	3	2
skopa_12	278.0	FF	right	1	0	0	1	0
skopa_12	278.0	FF	left	1	F	G	3	2
sm00034-fischadler	279.0	FF	left	2	F	G	3	3
sm00034-fischadler	279.0	FF	right	2	F	G	2	3
sm000347-fischadler	280.0	FF	left	1	0	0	1	0
sm000347-fischadler	280.0	FF	right	1	F	G	3	1
tumblr_lh1sk37ujk1qftikio1_500	281.0	FF	left	2	F	G	3	2
tumblr_lh1sk37ujk1qftikio1_500	281.0	FF	right	2	F	G	2	2
TurkeyCreek019_zpsa051eb57	282.0	FF	left	2	F	G	3	3
TurkeyCreek019_zpsa051eb57	282.0	FF	right	2	F	G	3	3
Unqqqqqqqqqqqqq_zps0a8b2ed4	283.0	FF	right	1	0	0	1	0
Unqqqqqqqqqqqqq_zps0a8b2ed4	283.0	FF	left	1	F	G	3	1
Untitled	284.0	FF	left	2	F	G	3	3
Untitled	284.0	FF	right	2	F	G	3	3
Untitluturu_zps9790451a	285.0	FF	left	1	0	0	1	0
Untitluturu_zps9790451a	285.0	FF	right	1	F	G	3	1
VieraWetlands231	286.0	FF	right	1	0	0	1	0
VieraWetlands231	286.0	FF	left	1	F	G	3	2
wendorff_osprey	287.0	FF	left	1	0	0	3	0
wendorff_osprey	287.0	FF	right	1	F	G	3	2
Windows-Live-Writer-abb38e2597ce_1017B-PIX _1-8x6_1	288.0	FF	left	2	F	G	3	2
Windows-Live-Writer-abb38e2597ce_1017B-PIX _1-8x6_1	288.0	FF	right	2	F	G	3	2
Windows-Live-Writer-abb38e2597ce_1017B-PIX _6-8x6_fc0e2032-1dde-4a83-a4ac-82b05819ebc0	289.0	FF	right	1	0	0	1	0
Windows-Live-Writer-abb38e2597ce_1017B-PIX _6-8x6_fc0e2032-1dde-4a83-a4ac-82b05819ebc0	289.0	FF	left	1	F	G	3	2
Z8320450-Osprey_with_Needle_F-SPL	290.0	FF	left	2	F	G	3	1
Z8320450-Osprey_with_Needle_F-SPL	290.0	FF	right	2	F	G	3	1
zhyvotnye-26-11-814x990	291.0	FF	left	1	F	G	1	1
zhyvotnye-26-11-814x990	291.0	FF	right	1	F	G	3	2
1 27 13 osprey stick 2	292.0	NB	left	2	O	G	2	1
1 27 13 osprey stick 2	292.0	NB	right	2	O	G	1	1
1 27 13 osprey stick 4	293.0	NB	left	2	O	G	3	1
1 27 13 osprey stick 4	293.0	NB	right	2	O	G	3	1
2 15 12 osprey with stick2	294.0	NB	right	1	O	G	3	1
2 15 12 osprey with stick4	295.0	NB	right	1	O	G	1	1
2 15 12 osprey with stick4	295.0	NB	left	1	T	P	3	4
2-osprey-building-nest-micah-smith	296.0	NB	right	2	O	G	1	1
8i5q9922	297.0	NB	left	2	O	G	1	1
8i5q9922	297.0	NB	right	2	O	G	3	1
17	298.0	NB	left	2	O	G	3	1
17	298.0	NB	right	2	O	G	3	1
55	299.0	NB	left	1	0	0	3	0
55	299.0	NB	right	1	O	G	3	1
56	300.0	NB	right	2	O	G	3	1
719BBEAF	301.0	NB	left	1	0	0	3	0
719BBEAF	301.0	NB	right	1	O	G	3	1
1380_0	302.0	NB	left	2	O	G	3	1
1380_0	302.0	NB	right	2	O	G	3	1
2013Osprey2mark-1	303.0	NB	left	2	O	G	1	1
2013Osprey2mark-1	303.0	NB	right	2	O	G	1	1
1145934_orig	304.0	NB	left	2	O	G	3	1
3256402_orig	305.0	NB	left	2	O	G	3	1
3256402_orig	305.0	NB	right	2	O	G	3	1
3352373_orig	306.0	NB	left	2	O	G	3	1
3352373_orig	306.0	NB	right	2	O	G	3	1
4234646_orig	307.0	NB	left	2	O	G	1	1
4558263_orig	308.0	NB	left	1	0	0	1	0
4558263_orig	308.0	NB	right	1	O	G	2	1
7056532_orig	309.0	NB	left	2	O	G	3	1
7056532_orig	309.0	NB	right	2	O	G	3	1
7568858_orig	310.0	NB	left	2	O	G	3	1
7568858_orig	310.0	NB	right	2	O	G	2	1
9230663_orig	311.0	NB	left	2	O	G	2	1
9230663_orig	311.0	NB	right	2	O	G	3	1
11029244-osprey-carrying-very-long-stick-to-his-nest-latin-name--pandion-haliaetus	312.0	NB	right	0	O	G	3	1
11029245-osprey-male-with-building-material-landing-on-nest-where-female-waiting-for-him--latin-name--pandion	313.0	NB	left	1	0	0	3	0
11029245-osprey-male-with-building-material-landing-on-nest-where-female-waiting-for-him--latin-name--pandion	313.0	NB	right	1	O	G	1	1
20120404-4-4-12IMG_7948	314.0	NB	left	2	O	G	1	1
20120404-4-4-12IMG_7948	314.0	NB	right	2	O	G	1	1
136765879.ucvpoLj2.2011_07_242094EOS1DMarkIV2	315.0	NB	right	1	0	0	3	0
136765879.ucvpoLj2.2011_07_242094EOS1DMarkIV2	315.0	NB	left	1	O	G	3	1
3158525362_7c7204f20b_z	316.0	NB	left	2	O	G	3	1
3372075156_553f53e2da_z	317.0	NB	left	1	0	0	3	0
3402342313_9ed2e19724_n	318.0	NB	left	2	O	G	3	1
3402342313_9ed2e19724_n	318.0	NB	right	2	O	G	3	1
4425187186_cc8bac4783_z	319.0	NB	left	2	O	G	3	1
4425187186_cc8bac4783_z	319.0	NB	right	2	O	G	3	1
8609853915_85a863b392_z	320.0	NB	left	0	0	0	1	0
8609853915_85a863b392_z	320.0	NB	right	0	0	0	3	0
8632496825_18fef88d4a_c	321.0	NB	right	1	T	P	3	1
8632496825_18fef88d4a_c	321.0	NB	left	1	S	P	2	4
8679983528_b05eec0459	322.0	NB	left	2	O	G	3	1
8679983528_b05eec0459	322.0	NB	right	2	O	G	3	1
8996502733_9e7473a1f6_o	323.0	NB	right	2	O	G	3	1
Adult-osprey-carrying-nesting-material	324.0	NB	right	1	O	G	3	1
artmax_32	325.0	NB	right	2	S	P	3	1
B_175	326.0	NB	left	2	S	P	1	4
B_175	326.0	NB	right	2	S	P	3	4
Balbuzard pecheur-4 Pandion haliaetus	327.0	NB	left	2	O	G	3	1
Balbuzard pecheur-4 Pandion haliaetus	327.0	NB	right	2	O	G	1	1
birdsnflight	328.0	NB	right	1	0	0	1	0
birdsnflight	328.0	NB	left	1	O	G	3	1
bobbar	329.0	NB	left	1	0	0	1	0
bobbar	329.0	NB	right	1	O	G	3	1
Buildingontothenest	330.0	NB	right	2	O	G	3	1
capecod	331.0	NB	right	2	O	G	3	1
crow-osprey-600	332.0	NB	left	2	S	P	1	3
crow-osprey-600	332.0	NB	right	2	S	P	1	3
crow-osprey-600	333.0	NB	left	2	O	G	1	1
Day9-692	334.0	NB	left	2	T	P	1	1
Day9-692	334.0	NB	right	2	T	P	3	1
DSC_0019-3	335.0	NB	left	0	0	0	1	0
DSC_0019-3	335.0	NB	right	0	0	0	1	0
dsc_0292	336.0	NB	left	2	O	G	3	1
dsc_0292	336.0	NB	right	2	O	G	3	1
DSC_18042_zpsec10d4a2	337.0	NB	left	2	O	G	1	1
DSC_18042_zpsec10d4a2	337.0	NB	right	2	O	G	1	1
DSC_18173_zpsfa6b847f	338.0	NB	left	2	O	G	3	1
DSC_18173_zpsfa6b847f	338.0	NB	right	2	O	G	3	1
DZ8T86961	339.0	NB	left	2	O	G	3	1
DZ8T86961	339.0	NB	right	2	O	G	3	1
DZ8T87141	340.0	NB	left	2	O	G	3	1
DZ8T87141	340.0	NB	right	2	O	G	3	1
explore.org	341.0	NB	left	2	S	P	1	4
explore.org	341.0	NB	right	2	S	P	1	4
explore.org2	342.0	NB	left	2	S	P	1	4
explore.org2	342.0	NB	right	2	S	P	3	4
fischadler_mk2n_27175_web	343.0	NB	left	1	0	0	3	0
fischadler_mk2n_27175_web	343.0	NB	right	1	O	G	3	1
fli(nes)	344.0	NB	left	2	O	G	1	2
flickrnest	345.0	NB	left	2	O	G	1	1
flickrtwig	346.0	NB	left	1	O	G	1	1
flickrtwig	346.0	NB	right	1	O	G	1	1
flik(nes)	347.0	NB	right	1	0	0	3	0
flik(nes)	347.0	NB	left	1	O	G	3	1
flik(nes)2	348.0	NB	right	1	0	0	1	0
flik(nes)2	348.0	NB	left	1	O	G	3	1
flik(nes)3	349.0	NB	left	1	O	G	1	1
flik(nes)3	349.0	NB	right	1	O	G	3	1
fliknes	350.0	NB	left	2	O	G	3	1
fliknes	350.0	NB	right	2	O	G	3	1
flikrnest	351.0	NB	left	2	O	G	3	2
flikrnest	351.0	NB	right	2	O	G	1	2
IMG_1441-1	352.0	NB	left	2	O	G	3	1
IMG_1441-1	352.0	NB	right	2	O	G	3	1
IMG_1449-1	353.0	NB	left	2	O	G	3	1
IMG_1449-1	353.0	NB	right	2	O	G	3	1
IMG_3199	354.0	NB	left	2	O	G	3	1
IMG_8642	355.0	NB	left	2	O	G	3	1
IMG-2783vv	356.0	NB	left	2	O	G	3	1
IMG-2783vv	356.0	NB	right	2	O	G	3	1
karmstrongsamples2	357.0	NB	left	2	O	G	3	1
karmstrongsamples2	357.0	NB	right	2	O	G	3	1
MJE_1745	358.0	NB	right	1	0	0	1	0
MJE_1745	358.0	NB	left	1	O	G	3	1
nest building_MG_6971 copy	359.0	NB	left	2	O	G	3	1
nest(2)	360.0	NB	left	1	0	0	3	0
nest(2)	360.0	NB	right	1	O	G	3	1
nest	361.0	NB	left	1	0	0	1	0
nest	361.0	NB	right	1	O	G	3	1
nestattack	362.0	NB	left	2	O	G	3	1
nestattack	362.0	NB	right	2	O	G	1	1
nestflickr	363.0	NB	right	2	O	G	3	1
osnest	364.0	NB	left	2	O	G	3	1
osnest	364.0	NB	right	2	O	G	3	1
osprey building nest 230408 (2)	365.0	NB	left	1	0	0	3	0
osprey building nest 230408 (2)	365.0	NB	right	1	S	P	3	4
osprey building nest 230408 (2)	366.0	NB	left	2	O	G	3	1
osprey building nest 230408 (5)	367.0	NB	right	1	0	0	3	0
osprey building nest 230408 (5)	367.0	NB	left	1	O	G	1	1
osprey building nest 230408 (5)	368.0	NB	left	2	O	G	3	1
Osprey(24)	369.0	NB	left	1	O	G	1	2
Osprey_for-raffle-web	370.0	NB	left	2	O	G	3	1
Osprey_for-raffle-web	370.0	NB	right	2	O	G	3	1
osprey+at+nest+Jim+Cruce	371.0	NB	left	2	O	G	1	1
osprey+at+nest+Jim+Cruce	371.0	NB	right	2	O	G	3	1
Osprey-003	372.0	NB	left	2	O	G	1	2
Osprey-003	372.0	NB	right	2	O	G	3	2
osprey-3-13-2008_0137copy(tonypratt)	373.0	NB	left	1	0	0	1	0
osprey-3-13-2008_0137copy(tonypratt)	373.0	NB	right	1	O	G	1	1
osprey-3-13-2008_0144copy(tonypratt)	374.0	NB	right	2	O	G	3	1
osprey3a-10	375.0	NB	left	2	O	G	1	1
osprey3a-10	375.0	NB	right	2	O	G	3	1
Osprey-04	376.0	NB	left	2	O	G	3	1
Osprey-04	376.0	NB	right	2	O	G	1	1
osprey-4(outdooralabama)	377.0	NB	left	0	0	0	3	0
osprey-4(outdooralabama)	377.0	NB	right	0	0	0	3	0
osprey-5	378.0	NB	left	2	O	G	1	1
osprey-5	378.0	NB	right	2	O	G	3	1
Osprey-08	379.0	NB	left	2	O	G	3	1
Osprey-08	379.0	NB	right	2	O	G	1	1
Osprey-171	380.0	NB	left	2	O	G	3	1
Osprey-171	380.0	NB	right	2	O	G	3	1
Osprey-172	381.0	NB	left	2	O	G	3	1
Osprey-172	381.0	NB	right	2	O	G	1	1
Osprey-Alex-2-1024x533	382.0	NB	right	1	0	0	3	0
Osprey-Alex-2-1024x533	382.0	NB	left	1	O	G	3	1
Osprey-Balbuzard_pecheur-Pandion_haliaetus_A44K0781-Edit-Edit	383.0	NB	left	2	O	G	3	1
Osprey-Balbuzard_pecheur-Pandion_haliaetus_A44K0781-Edit-Edit	383.0	NB	right	2	O	G	3	1
Osprey-Balbuzard_pecheur-Pandion_haliaetus_A44K1811	384.0	NB	left	2	O	G	3	1
Osprey-Balbuzard_pecheur-Pandion_haliaetus_A44K1811	384.0	NB	right	2	O	G	3	1
Osprey-Balbuzard_pecheur-Pandion_haliaetus_A44K1831	385.0	NB	left	2	O	G	1	1
Osprey-Balbuzard_pecheur-Pandion_haliaetus_A44K1831	385.0	NB	right	2	O	G	3	1
osprey-building-a-nest	386.0	NB	left	2	O	G	3	1
osprey-building-a-nest	386.0	NB	right	2	O	G	3	1
osprey-carrying-branch-for-nest-blue-cypress-lake1	387.0	NB	left	2	O	G	1	1
osprey-carrying-branch-for-nest-blue-cypress-lake1	387.0	NB	right	2	O	G	3	1
ospreyfeet11	388.0	NB	left	2	O	G	1	2
ospreyfeet11	388.0	NB	right	2	O	G	1	2
ospreyfeet12	389.0	NB	left	2	O	G	3	1
ospreyfeet12	389.0	NB	right	2	O	G	3	1
ospreyfeet14	390.0	NB	right	2	O	G	1	1
ospreyfeet14	390.0	NB	left	2	O	G	3	2
ospreyfeet15	391.0	NB	left	2	O	G	3	1
ospreyfeet15	391.0	NB	right	2	O	G	3	1
ospreyhawk	392.0	NB	left	2	O	G	3	1
ospreyhawk	392.0	NB	right	2	O	G	3	1
OspreyKB1	393.0	NB	left	2	O	G	3	1
OspreyKB1	393.0	NB	right	2	O	G	1	1
OspreyLakeshore (7)	394.0	NB	left	2	O	G	1	1
OspreyLakeshore (7)	394.0	NB	right	2	O	G	1	1
OspreyLakeshore (9)	395.0	NB	left	2	O	G	1	1
OspreyLakeshore (9)	395.0	NB	right	2	O	G	1	1
OspreyLakeshore (10)	396.0	NB	left	2	O	G	1	1
OspreyLakeshore (10)	396.0	NB	right	2	O	G	1	1
OspreyLakeshore	397.0	NB	left	2	O	G	3	1
OspreyLakeshore	397.0	NB	right	2	O	G	1	1
OspreyLakeshore+252822529-OspreyLakeshore 28229	398.0	NB	left	1	0	0	3	0
OspreyLakeshore+252822529-OspreyLakeshore 28229	398.0	NB	right	1	O	G	1	1
Osprey-Morisset-29July2009-024a	399.0	NB	right	1	O	G	2	1
osprey-nest-7-13-2008_071308_6412(tonypratt)	400.0	NB	right	2	S	P	3	4
osprey-nest-3532-web	401.0	NB	right	1	0	0	3	0
osprey-nest-3532-web	401.0	NB	left	1	O	G	3	1
ospreynestbuilding	402.0	NB	right	1	0	0	3	0
ospreynestbuilding	402.0	NB	left	1	O	G	3	1
OspreyNestBuilding1_Thumb1	403.0	NB	left	2	O	G	3	1
osprey-nest-building-cpt	404.0	NB	left	1	0	0	1	0
osprey-nest-building-cpt	404.0	NB	right	1	O	G	3	1
ospreynest-Edit	405.0	NB	left	1	0	0	1	0
ospreynest-Edit	405.0	NB	right	1	O	G	3	1
ospreyplatform(wildbeat)	406.0	NB	left	0	0	0	3	0
ospreyplatform(wildbeat)	406.0	NB	right	0	0	0	3	0
OspreyShrub1_Thumb1	407.0	NB	left	1	0	0	1	0
OspreyShrub2_Thumb1	408.0	NB	left	2	O	G	3	1
Ospreysmalenestbuilding(avainweb)	409.0	NB	right	1	0	0	3	0
Ospreysmalenestbuilding(avainweb)	409.0	NB	left	1	O	G	3	1
Osprey-Stick	410.0	NB	left	2	O	G	3	1
Osprey-Stick	410.0	NB	right	2	O	G	3	1
OspreyStick_Thumb1	411.0	NB	left	1	0	0	1	0
OspreyStick_Thumb1	411.0	NB	right	1	O	G	2	1
ospreywithtwigs	412.0	NB	left	1	O	G	1	1
ospreywithtwigs	412.0	NB	right	1	O	G	2	1
P1290891Acr	413.0	NB	left	0	0	0	3	0
P1290891Acr	413.0	NB	right	0	0	0	3	0
Pandion_haliaetus_-Belize_-building_nest-8	414.0	NB	left	1	0	0	3	0
Pandion_haliaetus_-Belize_-building_nest-8	414.0	NB	right	1	O	G	3	1
shop	415.0	NB	right	1	0	0	1	0
shop	415.0	NB	left	1	O	G	1	1
shop	416.0	NB	right	2	S	P	2	2
sm000346-fischadler	417.0	NB	left	2	O	G	3	1
steider-studios-osprey-building-nest-5-19-13	418.0	NB	left	2	O	G	3	1
steider-studios-osprey-building-nest-5-19-13	418.0	NB	right	2	O	G	3	1
stickonflikr	419.0	NB	left	1	0	0	3	0
stickonflikr	419.0	NB	right	1	O	G	3	1
_DSC5001_20	420.0	PF	right	1	F	G	2	1
_DSC5001_20	420.0	PF	left	1	T	P	2	1
_MG_2499_0772_edited-1	421.0	PF	right	1	S	P	3	4
1-14.	422.0	PF	left	1	T	P	1	2
1bbz_preau	423.0	PF	right	1	F	G	3	1
1bbz_preau	423.0	PF	left	1	T	P	1	1
1IMG_24371	424.0	PF	left	1	F	G	2	3
1IMG_24371	424.0	PF	right	1	T	P	3	1
2c7escd	425.0	PF	right	1	S	P	1	3
2chicks	426.0	PF	left	1	0	0	1	0
2chicks	426.0	PF	right	1	S	P	2	4
6-0-23	428.0	PF	right	1	T	P	2	3
0012-New-Years-Birds-CB3F6774-Edit-2	430.0	PF	right	1	F	G	3	2
0012-New-Years-Birds-CB3F6774-Edit-2	430.0	PF	left	1	T	P	1	4
18bac94d3495ac1ded74643de7a93ea0	431.0	PF	right	1	F	G	3	2
38	432.0	PF	left	2	T	P	1	1
45	434.0	PF	right	1	F	G	3	2
45	434.0	PF	left	1	T	P	1	3
49	435.0	PF	right	1	T	P	1	4
60	436.0	PF	left	1	F	G	3	2
60	436.0	PF	right	1	T	P	2	3
105pp-722x1024	437.0	PF	left	1	F	G	3	2
105pp-722x1024	437.0	PF	right	1	T	P	1	1
147	438.0	PF	left	1	F	G	3	1
147	438.0	PF	right	1	S	P	1	3
320	439.0	PF	left	1	F	G	3	2
320	439.0	PF	right	1	S	P	2	3
459	440.0	PF	right	1	F	G	3	2
800x532623	442.0	PF	left	2	F	G	1	2
800x532623	442.0	PF	right	2	F	G	3	2
1024x768_DSC-1130	444.0	PF	left	1	T	P	2	3
2328l-balbuzard-pecheur-pandion-haliaetus	445.0	PF	left	1	T	P	1	2
7542e1fa	446.0	PF	right	1	S	P	1	1
12171	447.0	PF	left	1	F	G	3	2
17101	448.0	PF	left	1	F	G	3	2
278447_orig	449.0	PF	right	1	F	G	3	1
278447_orig	449.0	PF	left	1	T	P	1	3
2407262(panoramio)	450.0	PF	right	1	T	P	2	4
4554241-balbuzard-pecheur-pandion-haliaetus-dans-un-arbre-manger-un-poisson-contre-un-ciel-bleu	451.0	PF	left	1	T	P	1	2
5409537_orig	452.0	PF	left	1	S	P	3	4
	453.0	PF	left	1	F	G	3	3
5683218_orig	454.0	PF	right	1	F	G	3	3
5683218_orig	454.0	PF	left	1	T	P	2	2
	456.0	PF	right	1	F	G	3	1
18317705	460.0	PF	left	2	S	P	1	4
18317705	460.0	PF	right	2	S	P	1	4
	461.0	PF	right	1	F	G	3	2
20502703	465.0	PF	right	1	F	G	3	2
21028786	469.0	PF	right	2	S	P	3	4
50209170	474.0	PF	right	1	T	P	1	1
114268132fjuSXeUU	475.0	PF	left	1	S	P	2	3
114417764CGS1gMaH	476.0	PF	left	1	F	G	1	2
114417764CGS1gMaH	476.0	PF	right	1	S	P	1	4
123512711	477.0	PF	right	1	0	0	2	0
123512711	477.0	PF	left	1	F	G	3	2
135028734	480.0	PF	left	1	0	0	3	0
135028734	480.0	PF	right	1	F	G	3	2
140514725	484.0	PF	left	2	S	P	1	4
140514725	484.0	PF	right	2	S	P	2	4
142819707	488.0	PF	left	1	F	G	3	1
	489.0	PF	left	2	S	P	3	4
	489.0	PF	right	2	S	P	3	4
150218652	493.0	PF	left	1	F	G	3	2
164084609	495.0	PF	left	1	F	G	2	2
	497.0	PF	left	1	O	G	3	1
	497.0	PF	right	1	S	P	1	4
220815649	499.0	PF	right	1	F	G	3	1
604775766_Eack2-L	501.0	PF	left	1	F	G	2	2
630481820_Rj4WA-L	502.0	PF	right	1	S	P	3	3
1344632012-Osprey-on-perch_with_fish-200(enature)	503.0	PF	left	1	F	G	3	2
1344632012-Osprey-on-perch_with_fish-200(enature)	503.0	PF	right	1	T	P	2	1
2234395715	504.0	PF	right	2	S	P	2	4
4583033442_2532c542c5	508.0	PF	left	1	F	G	1	2
4583033442_2532c542c5	508.0	PF	right	1	T	P	1	3
7779340724_d3442c811e_o	509.0	PF	right	1	F	G	3	2
20090300000000	510.0	PF	left	1	T	P	2	2
aby-2675-1000x1000	511.0	PF	right	1	S	P	3	3
aby-8407-1509x1509	512.0	PF	right	1	F	G	3	1
Adult-osprey-with-prey	513.0	PF	right	1	F	G	3	3
Adult-osprey-with-prey	513.0	PF	left	1	T	P	2	1
aguila 3	514.0	PF	left	1	F	G	3	2
aguila 3	514.0	PF	right	1	T	P	3	2
aguila4	515.0	PF	left	1	F	G	3	2
aguila4	515.0	PF	right	1	T	P	3	2
artcom	516.0	PF	left	1	F	G	3	1
artcom	516.0	PF	right	1	T	P	3	2
Balbuzard (1)	517.0	PF	right	1	F	G	3	2
balbuzard (3)	518.0	PF	left	1	T	P	3	2
balbuzard.pecheur.chma.1g	520.0	PF	left	1	S	P	3	2
Balbuzard_pecheur_IMG_7359	521.0	PF	right	1	T	P	1	2
Balbuzard_pecheur_IMG_7362	522.0	PF	right	1	T	P	1	2
Balbuzard_pecheur	523.0	PF	left	1	F	G	3	3
Balbuzard_pecheur	523.0	PF	right	1	S	P	3	4
balbuzard-pecheur-21	524.0	PF	right	1	T	P	3	1
basssupper	526.0	PF	right	1	0	0	1	0
basssupper	526.0	PF	left	1	F	G	3	2
BB-osprey-222-300x463(wildscotland)	529.0	PF	right	1	T	P	3	3
BCosprey2_2mark	530.0	PF	right	1	0	0	3	0
BCosprey2_2mark	530.0	PF	left	1	F	G	3	2
bird350-DSC6669	531.0	PF	left	1	T	P	3	2
bird-fight-2a	532.0	PF	left	2	T	P	1	1
bird-fight-2a	532.0	PF	right	2	T	P	1	1
birdwesee	533.0	PF	left	1	F	G	3	1
C0039479-Osprey-SPL	535.0	PF	left	1	0	0	3	0
C0039479-Osprey-SPL	535.0	PF	right	1	F	G	3	1
D1_08copy	536.0	PF	left	1	F	G	3	2
d3c997626c42e645affadcbd1e90c94a	538.0	PF	left	1	F	G	3	2
d3c997626c42e645affadcbd1e90c94a	538.0	PF	right	1	S	P	2	3
DSC_0172	539.0	PF	right	1	T	P	3	3
DSC_0594	540.0	PF	right	1	T	P	1	3
DSC_1424	541.0	PF	left	1	F	G	3	2
DSC_1424	541.0	PF	right	1	T	P	3	2
DSC_1907	542.0	PF	left	1	F	G	3	2
DSC_1907	542.0	PF	right	1	T	P	2	3
DSC_2577_zps5afc6a33	543.0	PF	left	1	F	G	3	2
DSC_4145_zps17dae539	544.0	PF	left	1	F	G	3	1
DSC_4158_zpsb30214b1	545.0	PF	left	1	F	G	3	1
DSC_4158_zpsb30214b1	545.0	PF	right	1	T	P	3	3
DSC_4182_zps932270ad	546.0	PF	right	1	F	G	3	2
DSC_4182_zps932270ad	546.0	PF	left	1	T	P	1	2
DSC06869b	547.0	PF	right	1	0	0	3	0
DSC06869b	547.0	PF	left	1	F	G	3	1
DSC07557(jeffincy)	548.0	PF	right	1	T	P	1	2
DSC034902	549.0	PF	right	1	F	G	3	1
DSC034902	549.0	PF	left	1	S	P	3	4
DSCN0634	550.0	PF	left	1	T	P	3	2
EarlyMorning518copy	551.0	PF	left	1	F	G	2	3
eating-5aa	552.0	PF	right	1	S	P	2	4
EstoniaOspreyJune152013	553.0	PF	left	2	S	P	1	4
EstoniaOspreyJune152013	553.0	PF	right	2	S	P	1	4
	554.0	PF	right	1	F	G	3	2
file-15	555.0	PF	left	1	F	G	3	1
File0329	556.0	PF	right	1	F	G	1	1
File0329	556.0	PF	left	1	T	P	3	4
fischadler2	557.0	PF	right	1	F	G	3	1
fischadler2	557.0	PF	left	1	T	P	3	3
fischadler3	558.0	PF	right	1	S	P	1	1
Fish For Dinner	559.0	PF	left	1	F	G	2	2
	561.0	PF	left	1	S	P	3	3
FIshEaters_01(northshots)	562.0	PF	left	1	F	G	3	2
FIshEaters_01(northshots)	562.0	PF	right	1	T	P	3	2
FishingDec0902	563.0	PF	left	1	F	G	3	2
FishPoacher3	564.0	PF	right	1	F	G	3	2
FishPoacher3	564.0	PF	left	1	S	P	3	3
FL06 Osprey 0537	565.0	PF	left	1	F	G	3	2
FL06 Osprey 0537	565.0	PF	right	1	T	P	3	3
FL08Osprey2	566.0	PF	right	1	F	G	3	2
flic3	567.0	PF	right	1	T	P	1	3
flickragain	568.0	PF	right	1	F	G	3	2
flickragain	568.0	PF	left	1	T	P	3	2
flickragain4	569.0	PF	left	1	T	P	3	1
Florida2010027	570.0	PF	right	1	F	G	3	2
Florida2010027	570.0	PF	left	1	T	P	3	2
Froggie004	571.0	PF	left	1	F	G	2	1
Froggie004	571.0	PF	right	1	S	P	1	3
Gallery-osprey3-800	572.0	PF	right	1	T	P	3	2
Glaslyn Osprey 4 - credit Andy Rouse.jpg-550x0	573.0	PF	right	1	T	P	3	3
HauloverCanal126_zpsd95a4b2	574.0	PF	right	2	T	P	3	1
hugeflounder1	575.0	PF	left	1	F	G	3	3
IMG_0100	576.0	PF	left	1	F	G	3	2
IMG_1352	577.0	PF	left	2	T	P	3	2
IMG_1352	577.0	PF	right	2	T	P	3	2
IMG-1418	578.0	PF	right	1	F	G	3	1
IMG-1418	578.0	PF	left	1	T	P	1	2
IMG_1713	579.0	PF	left	1	F	G	1	1
IMG_1713	579.0	PF	right	1	S	P	1	4
IMG_1826	580.0	PF	left	1	T	P	3	2
IMG_2951	581.0	PF	right	1	F	G	1	2
IMG_2951	581.0	PF	left	1	S	P	1	3
IMG_2956	582.0	PF	right	1	F	G	3	2
IMG_2957	583.0	PF	right	1	F	G	3	2
IMG_2957	583.0	PF	left	1	S	P	3	3
IMG_3446_edited-1copy	584.0	PF	left	1	F	G	3	2
IMG_3446_edited-1copy	584.0	PF	right	1	S	P	1	2
IMG_4335	585.0	PF	left	1	F	G	3	1
IMG_4335	585.0	PF	right	1	T	P	1	3
IMG_5111	586.0	PF	left	1	T	P	3	2
IMG_5662	587.0	PF	right	1	F	G	3	2
IMG_5662	587.0	PF	left	1	T	P	3	1
img_628_osprey(zeller)	588.0	PF	left	1	T	P	1	2
IMG_7645	590.0	PF	left	1	S	P	1	3
IMG_7837	591.0	PF	left	1	F	G	3	2
IMG_7837	591.0	PF	right	1	T	P	3	2
IMG_8023	592.0	PF	left	1	F	G	3	2
IMG_8023	592.0	PF	right	1	T	P	1	1
IMG_8165	593.0	PF	left	1	F	G	3	1
IMG_8165	593.0	PF	right	1	T	P	3	1
IMG-2820v	594.0	PF	left	1	F	G	3	3
IMG-2820v	594.0	PF	right	1	T	P	1	3
Jasper-Wildlife-Osprey-Eating-Fish	595.0	PF	right	1	F	G	3	2
Jasper-Wildlife-Osprey-Eating-Fish	595.0	PF	left	1	T	P	3	1
july27thmomggflorida-620(sarasview)	596.0	PF	right	1	T	P	1	2
july27thmomggflorida-621(sarasview)	597.0	PF	right	1	T	P	1	2
Juvenile osprey with partially eaten fish (2)	599.0	PF	left	1	F	G	3	2
Juvenile osprey with partially eaten fish (2)	599.0	PF	right	1	T	P	1	4
Male-osprey-defending-prey-from-crows	601.0	PF	right	1	T	P	3	2
maxresdefault	602.0	PF	left	1	F	G	3	2
maxresdefault	602.0	PF	right	1	S	P	2	2
naples0210045	603.0	PF	left	2	T	P	1	3
naples0210045	603.0	PF	right	2	T	P	1	3
	604.0	PF	left	1	T	P	3	3
new	605.0	PF	right	1	F	G	3	1
new	605.0	PF	left	1	T	P	1	2
OrangeCounty2012009	607.0	PF	left	1	F	G	3	3
os2_N303418	608.0	PF	right	1	0	0	1	0
os2_N303418	608.0	PF	left	1	F	G	3	2
OSP2tr_zps77ac9e46	609.0	PF	left	1	S	P	3	1
ospbchcls9x-1	610.0	PF	right	1	F	G	3	2
Opsrey (Stuart, FL., 1-08)(2)	611.0	PF	left	1	T	P	3	2
Opsrey (Stuart, FL., 1-08)	612.0	PF	left	1	T	P	3	2
Osprey Eating A Fish(scottevers)	613.0	PF	left	1	T	P	1	2
Osprey Eating A Fish	614.0	PF	left	1	T	P	1	2
Osprey(6)	615.0	PF	left	1	F	G	3	3
Osprey(6)	615.0	PF	right	1	S	P	3	4
Osprey(21)	616.0	PF	right	1	S	P	3	3
Osprey(26)	617.0	PF	right	1	F	G	3	1
Osprey(26)	617.0	PF	left	1	T	P	3	1
Osprey,_Pandion_haliaetus,_yum_fish_dinner;_FL	618.0	PF	right	1	S	P	1	3
Osprey.61-1024x995	619.0	PF	left	1	F	G	3	1
osprey	620.0	PF	right	1	T	P	1	3
osprey_1	621.0	PF	right	1	F	G	3	2
Osprey_0420e	622.0	PF	right	1	F	G	1	3
osprey_d3x3421-as-smart-object-1	623.0	PF	right	1	F	G	3	2
Osprey-_-Ladyfish-035A-Jame	624.0	PF	right	1	F	G	3	2
Osprey_Morro_Strand_Beach	625.0	PF	right	1	T	P	3	2
Osprey_on_a_peg	626.0	PF	left	1	S	P	1	4
Osprey_with_fish	627.0	PF	right	1	T	P	2	1
Osprey-01	628.0	PF	right	1	F	G	3	3
Osprey-1	630.0	PF	left	2	T	P	1	4
Osprey-1	630.0	PF	right	2	T	P	3	4
Osprey-1.png	631.0	PF	right	1	F	G	3	2
Osprey-1.png	631.0	PF	left	1	S	P	1	2
osprey2(2)	632.0	PF	left	1	T	P	3	2
Osprey2	633.0	PF	left	1	S	P	1	3
OSPREY-2--43493	634.0	PF	right	1	T	P	3	1
osprey3	635.0	PF	left	1	F	G	1	2
OSPREY3pandionphaliaetus	636.0	PF	right	1	T	P	1	3
Osprey5 (2)	637.0	PF	left	1	T	P	2	4
Osprey5	638.0	PF	right	2	F	G	3	1
Osprey-7(scottevers)	639.0	PF	left	1	F	G	3	2
Osprey-7	640.0	PF	left	1	F	G	3	2
osprey9	641.0	PF	left	1	F	G	1	1
osprey9	641.0	PF	right	1	T	P	1	3
osprey15	643.0	PF	left	1	T	P	2	2
osprey-15-fla	644.0	PF	right	1	F	G	1	3
osprey-15-fla	644.0	PF	left	1	T	P	1	3
osprey16	645.0	PF	right	1	F	G	3	2
Osprey021	646.0	PF	left	1	F	G	3	2
Osprey021	646.0	PF	right	1	T	P	1	3
osprey0070	647.0	PF	right	1	F	G	3	3
Osprey-0665_zps3c25af3e	648.0	PF	right	1	S	P	1	3
Osprey-27527-1	649.0	PF	left	1	F	G	3	2
Osprey-27527-1	649.0	PF	right	1	S	P	2	1
Ospreyandcatfish	651.0	PF	right	1	S	P	1	3
Osprey-Barrington-20-22Dec05250a	652.0	PF	left	1	F	G	3	2
Osprey-Bridge(wildbeat)	653.0	PF	left	1	F	G	3	2
osprey-dead-tree-eating-fish-20711451	654.0	PF	right	1	F	G	3	1
osprey-dead-tree-eating-fish-20711451	654.0	PF	left	1	T	P	3	3
ospreyeat3	655.0	PF	right	1	T	P	1	2
ospreyeating	656.0	PF	left	1	F	G	3	1
ospreyeating	656.0	PF	right	1	T	P	3	3
osprey-eating-a-large-fish-judy-via-wolff	657.0	PF	left	1	F	G	1	2
osprey-eating-a-large-fish-judy-via-wolff	657.0	PF	right	1	T	P	2	3
Osprey-feeding-on-fish (1)	658.0	PF	right	1	F	G	3	2
osprey-feeding-on-fish (2)	659.0	PF	right	1	F	G	1	2
osprey-feeding-on-fish	660.0	PF	left	1	T	P	3	3
ospreyfeet1	661.0	PF	right	1	F	G	3	2
ospreyfeet2	662.0	PF	left	1	S	P	1	4
ospreyfeet3	663.0	PF	left	1	F	G	1	2
ospreyfeet11	664.0	PF	left	1	T	P	3	1
ospreyfeet11	664.0	PF	right	1	S	P	1	2
ospreyfeet12	665.0	PF	left	1	T	P	3	1
ospreyfeet12	665.0	PF	right	1	S	P	1	2
ospreyfeet15	666.0	PF	right	1	F	G	3	3
ospreyfeet15	666.0	PF	left	1	T	P	1	2
ospreyFish1a_50	667.0	PF	right	1	F	G	3	2
OspreyFish-748290	668.0	PF	left	1	F	G	3	2
OspreyFishing	669.0	PF	left	1	S	P	2	3
Ospreylater	670.0	PF	left	1	F	G	3	2
Ospreylater	670.0	PF	right	1	T	P	3	3
OspreyMaleFeed(avianweb)	671.0	PF	right	1	T	P	3	2
Osprey-Nap(wildbeat)	672.0	PF	left	1	F	G	3	1
Osprey-on-branch-on-beach-_T9J9725-Little-Estero-Lagoon,-Ft	673.0	PF	left	1	F	G	3	2
Osprey-on-branch-on-beach-_T9J9725-Little-Estero-Lagoon,-Ft	673.0	PF	right	1	T	P	2	1
osprey-stare_0193-copy-e1367408763190	674.0	PF	right	1	T	P	3	1
Ospreythreatening(avainweb)	675.0	PF	left	1	F	G	3	1
Ospreythreatening(avainweb)	675.0	PF	right	1	T	P	3	2
Osprey-w-Fish.-GBH-Fox-Bombay-3.29.2011_0177(tonypratt)	676.0	PF	right	1	F	G	3	3
Osprey-w-Fish.-GBH-Fox-Bombay-3.29.2011_0177	677.0	PF	right	1	F	G	3	3
osprey-with-bunker-18372lr	678.0	PF	left	1	F	G	3	2
Ospreywithfish-1	679.0	PF	left	1	F	G	3	1
Ospreywithfish-1	679.0	PF	right	1	T	P	3	3
Ospreywithfish-2	680.0	PF	right	1	F	G	3	3
Ospreywithfish-2	680.0	PF	left	1	T	P	3	1
OspreywithFishsharper_zpsea3cd800	681.0	PF	left	1	F	G	3	2
OspreywithFishsharper_zpsea3cd800	681.0	PF	right	1	T	P	3	3
OsprJH062011	682.0	PF	right	1	T	P	2	4
P1010098_2	683.0	PF	right	1	F	G	2	1
P1010098_2	683.0	PF	left	1	S	P	1	3
P1020374d	684.0	PF	right	1	F	G	3	2
P1020374d	684.0	PF	left	1	S	P	2	4
P1110829ospreyandcatch	686.0	PF	right	1	F	G	3	3
P1245230dsampdcrre_zps29e9a6b2	687.0	PF	left	1	0	0	1	0
P1245230dsampdcrre_zps29e9a6b2	687.0	PF	right	1	T	P	1	1
Pandioin_haliaetus	688.0	PF	right	1	F	G	3	1
pandion_haliaetus_(with_prey)	689.0	PF	right	1	F	G	3	2
pandion_haliaetus_(with_prey)	689.0	PF	left	1	T	P	3	3
Pandion_haliaetus_-San_Francisco_Bay,_California,_USA_-with_fish-8	690.0	PF	left	1	F	G	3	2
Pandion_haliaetus_-San_Francisco_Bay,_California,_USA_-with_fish-8	690.0	PF	right	1	S	P	1	4
PB050163	691.0	PF	left	1	T	P	2	1
PB132651	692.0	PF	left	2	S	P	2	3
PB132651	692.0	PF	right	2	S	P	1	3
photos999-0579-balbuzard-pecheur-Saint-Quentin-78_DxO	693.0	PF	left	1	F	G	3	1
photos999-0579-balbuzard-pecheur-Saint-Quentin-78_DxO	693.0	PF	right	1	T	P	3	1
photos999-0693-balbuzard-pecheur-Saint-Quentin-78_DxO	694.0	PF	left	1	F	G	3	1
photos999-0693-balbuzard-pecheur-Saint-Quentin-78_DxO	694.0	PF	right	1	T	P	3	1
photos999-0695-balbuzard-pecheur-Saint-Quentin-78_DxO	695.0	PF	left	1	F	G	3	1
photos999-0695-balbuzard-pecheur-Saint-Quentin-78_DxO	695.0	PF	right	1	T	P	3	1
Robinson_001	696.0	PF	right	1	T	P	1	1
rolfnussbaumer3	697.0	PF	right	1	F	G	3	2
rolfnussbaumer5	698.0	PF	right	1	F	G	3	2
sarahs-view-from-the-bottom-022	699.0	PF	left	1	F	G	3	2
sarahs-view-from-the-bottom-030	700.0	PF	left	1	F	G	3	2
sarahs-view-from-the-bottom-050	701.0	PF	left	1	F	G	2	2
sarahs-view-from-the-bottom-050	701.0	PF	right	1	T	P	1	4
seahawk072207	703.0	PF	right	1	F	G	3	1
seahawk072207	703.0	PF	left	1	S	P	1	3
seahawk072207 057	704.0	PF	right	1	F	G	3	1
seahawk072207 057	704.0	PF	left	1	S	P	1	3
Skopa	705.0	PF	right	1	F	G	3	1
Skopa	705.0	PF	left	1	T	P	3	2
stock-photo-osprey-eating-fish-in-everglades-national-park-30014200	706.0	PF	right	1	F	G	3	2
sunset osprey	707.0	PF	left	1	T	P	2	3
Teyrê_masîyan	708.0	PF	left	1	F	G	1	1
uasass_zpsd1727725	709.0	PF	left	1	F	G	3	2
Uedgphb_zps1433272b	711.0	PF	right	1	F	G	3	2
Untitledgvsdg_zpsbb350743	712.0	PF	right	1	F	G	3	1
Visarend12	714.0	PF	left	1	S	P	2	4
vk602	715.0	PF	left	1	F	G	3	2
Wild_Pandion	716.0	PF	left	1	S	P	2	3
youngflordiaosprey	717.0	PF	left	1	F	G	3	1
yummy1-as-smart-object-1	718.0	PF	left	1	F	G	3	2
yummy1-as-smart-object-1	718.0	PF	right	1	T	P	2	3
Z8320131-Osprey-SPL	719.0	PF	left	1	F	G	3	2
Z8320131-Osprey-SPL	719.0	PF	right	1	T	P	3	3
Z8320343-Osoprey-SPL	720.0	PF	left	1	0	0	1	0
Z8320352-Osprey_eating_fish-SPL(2)	721.0	PF	right	1	F	G	3	2
Z8320352-Osprey_eating_fish-SPL(2)	721.0	PF	left	1	T	P	3	3
Z8320352-Osprey_eating_fish-SPL	722.0	PF	right	1	F	G	3	2
Z8320352-Osprey_eating_fish-SPL	722.0	PF	left	1	T	P	3	3
Z8320449-Osprey-SPL	723.0	PF	right	1	F	G	3	2
Z8320449-Osprey-SPL	723.0	PF	left	1	T	P	1	3
_47868385_osprey6	724.0	PW	right	1	F	G	3	1
_59242304_osprey624	725.0	PW	left	1	0	0	2	0
_59242304_osprey624	725.0	PW	right	1	T	P	1	4
_DSC1532copy	726.0	PW	right	2	T	P	1	2
_DSC2040copy	727.0	PW	left	2	T	P	2	2
_DSC3098	728.0	PW	left	2	T	P	1	1
_DSC3098	728.0	PW	right	2	T	P	1	1
_DSC5357	729.0	PW	left	2	T	P	1	2
_DSC5747-Edit	730.0	PW	left	2	T	P	1	2
_DSC5747-Edit	730.0	PW	right	2	T	P	1	2
_MJE6169	731.0	PW	left	2	T	P	1	2
_TES7177	732.0	PW	left	2	T	P	3	1
_TES7177	732.0	PW	right	2	T	P	1	1
_TES7303	733.0	PW	right	2	T	P	3	1
0_3cf80_b0b95f04_XXXL	734.0	PW	left	2	S	P	2	1
0_3cf80_b0b95f04_XXXL	734.0	PW	right	2	S	P	3	1
0_5f8cf_43a57496_XL	735.0	PW	left	2	S	P	1	3
0_7681d_d09d58dc_orig	736.0	PW	right	2	S	P	1	3
1	737.0	PW	left	2	T	P	1	1
1	737.0	PW	right	2	T	P	1	1
2 15 12 osprey with stick4	738.0	PW	right	1	T	P	3	1
2 15 12 osprey with stick4	738.0	PW	left	1	T	P	2	3
9c87c7e82710be93e43ebb9bf3ec8505	739.0	PW	left	2	S	P	1	2
9c87c7e82710be93e43ebb9bf3ec8505	739.0	PW	right	2	S	P	1	2
14	740.0	PW	left	2	T	P	1	1
20	741.0	PW	left	2	T	P	3	1
21	742.0	PW	left	2	T	P	1	1
21	742.0	PW	right	2	T	P	1	1
0024-New-Years-Birds-CB3F7025-Edit	743.0	PW	right	1	T	P	2	2
33	744.0	PW	right	2	T	P	3	1
53b7dcc1-f454-3220-ba23-0fa8cbe4b6c2	745.0	PW	left	1	0	0	1	0
76c5c5ee57b6ff01731605c2e9761f9c	746.0	PW	left	2	T	P	3	1
76c5c5ee57b6ff01731605c2e9761f9c	746.0	PW	right	2	T	P	2	1
101_0140	747.0	PW	right	1	0	0	1	0
101_0140	747.0	PW	left	1	T	P	3	2
116	748.0	PW	left	2	S	P	3	2
116	748.0	PW	right	2	S	P	3	2
186a2a83-3b43-3f63-afcc-61dcf0217656	749.0	PW	right	1	T	P	1	2
600-6	750.0	PW	right	2	T	P	3	2
600b-1	751.0	PW	left	2	T	P	1	2
600b-1	751.0	PW	right	2	T	P	2	3
614	752.0	PW	left	2	T	P	1	1
614	752.0	PW	right	2	T	P	1	1
807(mikerae)	753.0	PW	left	2	T	P	1	1
807(mikerae)	753.0	PW	right	2	T	P	2	1
2009Jul14_LukesOsprey_0239	754.0	PW	left	2	S	P	1	1
2009Jul14_LukesOsprey_0239	754.0	PW	right	2	S	P	2	1
2013Osprey8mark	755.0	PW	left	2	T	P	1	1
2013Osprey8mark	755.0	PW	right	2	T	P	1	1
2515l-balbuzard-pecheur-pandion-haliaetus	756.0	PW	right	2	S	P	2	3
7393	757.0	PW	left	2	T	P	1	1
7393	757.0	PW	right	2	T	P	1	1
20960_262192046879_262097441879_325	758.0	PW	left	2	T	P	1	1
20960_262192046879_262097441879_325	758.0	PW	right	2	T	P	3	1
090710_fiskeorn6_blogg	759.0	PW	left	2	T	P	2	2
090710_fiskeorn6_blogg	759.0	PW	right	2	T	P	1	2
090710_fiskeorn9_blogg	760.0	PW	left	2	T	P	1	2
090710_fiskeorn9_blogg	760.0	PW	right	2	T	P	1	2
090710_fiskeorn28_blogg	761.0	PW	left	2	T	P	1	1
090710_fiskeorn28_blogg	761.0	PW	right	2	T	P	3	1
091009OSPR01	762.0	PW	left	2	T	P	2	2
091009OSPR01	762.0	PW	right	2	T	P	3	2
100129_37090valley-trip_filtered	763.0	PW	left	1	F	G	3	2
100129_37090valley-trip_filtered	763.0	PW	right	1	S	P	1	4
120514Arboretum194-L	764.0	PW	left	2	T	P	1	1
120514Arboretum194-L	764.0	PW	right	2	T	P	1	1
428562_orig	765.0	PW	right	2	S	P	2	2
573777_orig	766.0	PW	left	2	T	P	1	1
573777_orig	766.0	PW	right	2	T	P	2	1
907393_orig	767.0	PW	left	2	T	P	1	2
907393_orig	767.0	PW	right	2	T	P	1	2
1235777_orig	768.0	PW	right	2	T	P	1	3
1595709_orig	769.0	PW	left	2	T	P	2	2
1595709_orig	769.0	PW	right	2	T	P	3	2
1907552_orig	770.0	PW	left	2	T	P	1	1
1907552_orig	770.0	PW	right	2	T	P	1	1
2083499_orig	771.0	PW	left	2	T	P	2	1
2107907_orig	772.0	PW	left	2	T	P	2	2
2107907_orig	772.0	PW	right	2	T	P	1	2
2217581_orig	773.0	PW	left	2	T	P	2	1
2217581_orig	773.0	PW	right	2	T	P	1	1
2373245_orig	774.0	PW	left	2	T	P	3	1
2373245_orig	774.0	PW	right	2	T	P	3	1
2467999_orig	775.0	PW	left	2	T	P	1	2
2467999_orig	775.0	PW	right	2	T	P	1	2
2487318_orig	776.0	PW	left	2	T	P	1	1
2487318_orig	776.0	PW	right	2	T	P	1	1
2558081_orig	777.0	PW	right	1	0	0	3	0
2558081_orig	777.0	PW	left	1	T	P	3	1
2712400_orig	778.0	PW	right	1	0	0	3	0
2884251_orig	779.0	PW	left	2	T	P	3	2
3248812_orig	780.0	PW	left	2	T	P	3	1
3248812_orig	780.0	PW	right	2	T	P	1	1
3272014_orig	781.0	PW	left	2	T	P	2	1
3272014_orig	781.0	PW	right	2	T	P	3	1
3751228_orig	782.0	PW	left	2	T	P	3	1
3751228_orig	782.0	PW	right	2	T	P	3	1
4161688_orig	783.0	PW	right	2	T	P	3	2
6063874_orig	784.0	PW	left	2	T	P	1	1
6063874_orig	784.0	PW	right	2	T	P	2	1
6282850_orig	785.0	PW	left	2	T	P	1	1
6282850_orig	785.0	PW	right	2	T	P	2	1
6350262_orig	786.0	PW	right	2	T	P	1	2
7304217_orig	787.0	PW	left	2	T	P	1	2
7304217_orig	787.0	PW	right	2	T	P	1	2
7304217_orig	788.0	PW	left	2	T	P	3	2
7304217_orig	788.0	PW	right	2	T	P	2	2
7665590_orig	789.0	PW	right	2	T	P	3	2
7677908_orig	790.0	PW	left	2	T	P	1	1
7677908_orig	790.0	PW	right	2	T	P	2	1
7856844_orig	791.0	PW	left	2	T	P	1	1
7856844_orig	791.0	PW	right	2	T	P	3	1
8171196_orig	792.0	PW	left	2	T	P	2	2
8171196_orig	792.0	PW	right	2	T	P	2	2
8212251_orig	793.0	PW	left	2	T	P	1	1
8212251_orig	793.0	PW	right	2	T	P	3	1
8217391_orig	794.0	PW	left	2	T	P	3	3
8224524_orig	795.0	PW	left	2	T	P	1	2
8224524_orig	795.0	PW	right	2	T	P	1	2
8685686_orig	796.0	PW	left	1	0	0	3	0
8685686_orig	796.0	PW	right	1	T	P	1	2
9155034_orig	797.0	PW	left	2	T	P	3	1
9155034_orig	797.0	PW	right	2	T	P	1	1
9243724_orig	798.0	PW	left	2	T	P	1	1
9243724_orig	798.0	PW	right	2	T	P	3	1
9743163b91fed5e0becd6a18eed106a2	799.0	PW	right	2	T	P	3	2
20120330-IMG_7731	800.0	PW	left	2	T	P	2	2
20120330-IMG_7731	800.0	PW	right	2	T	P	1	2
20120421-4-21-12IMG_0202	801.0	PW	left	2	O	G	2	3
20120421-4-21-12IMG_0202	801.0	PW	right	2	O	G	3	3
20120421-IMG_0201	802.0	PW	right	2	T	P	3	2
20120705-IMG_9582	803.0	PW	left	2	T	P	1	2
20120705-IMG_9582	803.0	PW	right	2	T	P	1	2
20120810-8-10-12IMG_3613	804.0	PW	left	2	T	P	3	2
20120810-8-10-12IMG_3613	804.0	PW	right	2	T	P	1	2
76203219_dyke_perched_osprey	805.0	PW	left	2	T	P	3	1
76203219_dyke_perched_osprey	805.0	PW	right	2	T	P	3	1
87185507_580d6cac18_z	806.0	PW	left	2	T	P	3	3
123184469NugvhyoN	807.0	PW	left	2	S	P	2	2
123184469NugvhyoN	807.0	PW	right	2	S	P	2	2
603922732_L4J8G-L-1	808.0	PW	left	2	T	P	1	2
603922732_L4J8G-L-1	808.0	PW	right	2	T	P	3	2
3870234542_4921d5c325	809.0	PW	left	2	S	P	1	2
3870234542_4921d5c325	809.0	PW	right	2	S	P	1	2
7868526210_8700ee113f_z	810.0	PW	left	2	T	P	1	2
7868526210_8700ee113f_z	810.0	PW	right	2	T	P	1	2
8715168046_47e3655fbf_z	811.0	PW	right	2	T	P	2	1
9389394352_15685768d3_b	812.0	PW	left	2	T	P	1	1
9389394352_15685768d3_b	812.0	PW	right	2	T	P	1	1
a(wicwaslake)	813.0	PW	left	2	T	P	1	1
a(wicwaslake)	813.0	PW	right	2	T	P	3	1
A_AguilaPescadora_600	814.0	PW	right	2	T	P	2	3
a6077a7e2212bdfc29d6c739b6bff310	815.0	PW	left	2	T	P	1	2
a6077a7e2212bdfc29d6c739b6bff310	815.0	PW	right	2	T	P	1	2
AA107129_dyfi_ospreys_andyrouse	816.0	PW	left	2	T	P	2	3
accouplementn-beers-smith	817.0	PW	left	2	S	P	1	4
accouplementn-beers-smith	818.0	PW	right	2	T	P	1	2
Adult-female-osprey-scratching-head	819.0	PW	right	1	0	0	3	0
alberto	820.0	PW	left	2	T	P	2	2
Aspira-Fund-Ospreys	821.0	PW	right	2	T	P	1	2
Assorted-10_zps22794354	822.0	PW	left	2	T	P	1	2
Assorted-10_zps22794354	822.0	PW	right	2	T	P	1	2
b8ffbe5e2155b50fc7e5377f8bac30a8	823.0	PW	left	2	T	P	1	3
b8ffbe5e2155b50fc7e5377f8bac30a8	823.0	PW	right	2	T	P	3	3
b9b475ae-d854-42bd-833f-f41a59bee567	824.0	PW	right	2	T	P	2	3
Baja_birds016-2	825.0	PW	left	2	T	P	1	2
Balbouzard pecheur_4248CSS	826.0	PW	left	2	S	P	1	2
Balbouzard pecheur_4248CSS	826.0	PW	right	2	S	P	1	2
Balbuzard pecheur [800x600]	827.0	PW	left	2	T	P	2	3
Balbuzard pecheur [800x600]	827.0	PW	right	2	T	P	2	3
balbuzard.pecheur.alfo.2g	828.0	PW	left	2	T	P	3	3
balbuzard.pecheur.alfo.2g	828.0	PW	right	2	T	P	3	3
balbuzard.pecheur.rabi.2g	829.0	PW	left	2	T	P	2	2
balbuzard.pecheur.rabi.2g	829.0	PW	right	2	T	P	1	2
balbuzard.pecheur.rabi.4g	830.0	PW	right	1	0	0	3	0
balbuzard.pecheur.rabi.4g	830.0	PW	left	1	T	P	3	2
balbuzard.pecheur.raro.1g	831.0	PW	left	2	T	P	1	3
balbuzard.pecheur.raro.1g	831.0	PW	right	2	T	P	1	3
Balbuzard_pecheur_IMG_7408	832.0	PW	left	2	T	P	3	2
Balbuzard_pecheur_IMG_7408	832.0	PW	right	2	T	P	1	2
Balbuzard_pecheur_IMG_7418	833.0	PW	right	1	0	0	3	0
Balbuzard_pecheur_IMG_7418	833.0	PW	left	1	T	P	3	2
Balbuzard_pecheurHyeres14092007-8418	834.0	PW	right	2	S	P	1	2
BCospreybranch1bvert	835.0	PW	left	2	T	P	2	1
BCospreybranch1bvert	835.0	PW	right	2	T	P	1	1
BCospreynestpairx	836.0	PW	left	2	T	P	1	2
BCospreynestpairx	836.0	PW	right	2	T	P	3	2
BCospreysolo2b	837.0	PW	left	2	T	P	3	3
BCospreysolo2b	837.0	PW	right	2	T	P	1	3
BCospreywings3	838.0	PW	left	2	T	P	1	1
birds-osprey-immature(2)	840.0	PW	right	1	T	P	1	1
Blackpoint20130114-990_zps931084e2	841.0	PW	left	2	T	P	1	3
Blackpoint20130114-990_zps931084e2	841.0	PW	right	2	T	P	1	3
Blogg 300511-3	842.0	PW	left	2	T	P	1	1
Blogg 300511-3	842.0	PW	right	2	T	P	2	1
Blogg 300511-6	843.0	PW	left	2	T	P	1	1
Blogg 300511-6	843.0	PW	right	2	T	P	2	1
Blogg 300511-8	844.0	PW	right	2	T	P	1	2
blogpost_59_osprey	845.0	PW	right	2	T	P	1	2
Branching-2	846.0	PW	left	2	T	P	3	2
Branching-2	846.0	PW	right	2	T	P	3	2
C01B4910_1	847.0	PW	right	1	0	0	3	0
C01B4910_1	847.0	PW	left	1	S	P	1	2
calling(wicwaslake)	848.0	PW	left	2	T	P	1	1
calling(wicwaslake)	848.0	PW	right	2	T	P	3	1
captiva423017	849.0	PW	left	2	S	P	1	3
captiva423017	849.0	PW	right	2	S	P	1	3
coolwildlife2	850.0	PW	left	2	T	P	1	2
CR1581Osprey	851.0	PW	left	2	T	P	1	2
CR1581Osprey	851.0	PW	right	2	T	P	1	2
D8G7D1967	852.0	PW	left	2	T	P	2	4
DSC_0208_2_zps8f321fe3	853.0	PW	left	2	T	P	3	3
DSC_0208_2_zps8f321fe3	853.0	PW	right	2	T	P	2	3
DSC_0342	854.0	PW	left	2	T	P	3	1
DSC_0342	854.0	PW	right	2	T	P	2	1
DSC_0622	855.0	PW	left	2	T	P	1	3
DSC_2245_zpsdd66222d	856.0	PW	right	2	T	P	3	1
DSC_2993	857.0	PW	left	2	T	P	2	2
DSC_3215_zps0b90cf35	858.0	PW	right	2	T	P	1	3
DSC_5716_zps25989f2d	859.0	PW	left	2	T	P	2	2
DSC_5716_zps25989f2d	859.0	PW	right	2	T	P	2	2
DSC_5727bw	860.0	PW	left	2	T	P	2	2
DSC_5727bw	860.0	PW	right	2	T	P	2	2
DSC_24104_zps110ad025	861.0	PW	right	2	S	P	3	4
dsc2812(birdlight)	862.0	PW	left	2	S	P	1	4
dsc2812(birdlight)	862.0	PW	right	2	S	P	1	4
DSC03140	863.0	PW	left	2	T	P	3	2
DSC03140	863.0	PW	right	2	T	P	1	2
DSC07984(wicwaslake)	864.0	PW	left	2	T	P	1	1
DSC07984(wicwaslake)	864.0	PW	right	2	T	P	1	1
DSC08053(wicwaslake)	865.0	PW	left	2	T	P	1	1
DSC08053(wicwaslake)	865.0	PW	right	2	T	P	3	1
DSC08097(wicwaslake)	866.0	PW	left	2	T	P	1	1
DSC08097(wicwaslake)	866.0	PW	right	2	T	P	3	1
DSC08109(wicwaslake)	867.0	PW	left	2	T	P	3	1
DSC08109(wicwaslake)	867.0	PW	right	2	T	P	1	1
DSCF0968	868.0	PW	left	2	T	P	1	1
DSCF0968	868.0	PW	right	2	T	P	3	1
DSCF3065	869.0	PW	left	2	T	P	3	2
DSCF3065	869.0	PW	right	2	T	P	3	2
DSCF3067	870.0	PW	left	2	T	P	3	2
DSCF3067	870.0	PW	right	2	T	P	1	2
DSCN1703Large	871.0	PW	left	2	S	P	1	2
DSCN1703Large	871.0	PW	right	2	S	P	1	2
DSCN1886-balbuzard-pecheur-91_DxO	872.0	PW	right	2	T	P	1	2
DSCN7259	873.0	PW	left	2	T	P	1	2
DSCN7259	873.0	PW	right	2	T	P	1	2
ebc4681a20ba9ab9982179d54e4a358c	874.0	PW	right	1	T	P	1	1
esterosprey4mark	875.0	PW	right	1	0	0	3	0
esterosprey4mark	875.0	PW	left	1	T	P	2	1
esterosprey6mark	876.0	PW	left	1	T	P	3	1
esterosprey6mark	876.0	PW	right	1	T	P	1	1
esterosprey11mark	877.0	PW	left	2	T	P	3	1
esterosprey11mark	877.0	PW	right	2	T	P	3	1
esterosprey12bmark	878.0	PW	left	2	T	P	1	1
esterosprey12bmark	878.0	PW	right	2	T	P	3	1
EvergladesOsprey(avianweb)	879.0	PW	left	2	T	P	1	3
EvergladesOsprey(avianweb)	879.0	PW	right	2	T	P	2	3
Feathers_2	880.0	PW	left	2	S	P	1	2
Feathers_2	880.0	PW	right	2	S	P	2	2
Female-chick-after-fledging	881.0	PW	right	1	0	0	3	0
Female-chick-after-fledging	881.0	PW	left	1	T	P	2	1
file-96	882.0	PW	right	1	T	P	3	2
file-97	883.0	PW	right	1	T	P	3	2
fischadler_maennchen1	884.0	PW	left	2	T	P	1	1
fischadler_maennchen1	884.0	PW	right	2	T	P	2	1
fischadler_weibchen1	885.0	PW	right	2	T	P	1	1
fischadler4	886.0	PW	left	2	S	P	1	1
fischadler4	886.0	PW	right	2	S	P	3	1
flic5	887.0	PW	right	2	T	P	3	3
flickraguila	888.0	PW	left	2	T	P	2	2
flickraguila	888.0	PW	right	2	T	P	3	2
flickraguila2	889.0	PW	left	2	T	P	2	1
flickraguila2	889.0	PW	right	2	T	P	2	1
flickraguila3	890.0	PW	left	2	T	P	1	1
flickraguila3	890.0	PW	right	2	T	P	2	1
Florida 1-02-08 2174b	891.0	PW	left	2	S	P	2	4
fore and aft(wicwaslake)	892.0	PW	left	2	T	P	1	1
fore and aft(wicwaslake)	892.0	PW	right	2	T	P	3	1
Francisco__Aguila_jpg_1299627564	893.0	PW	left	2	T	P	3	2
Francisco__Aguila_jpg_1299627564	893.0	PW	right	2	T	P	1	2
Goulaosprey	894.0	PW	left	2	T	P	2	2
Harriet29082012071801	895.0	PW	left	2	S	P	2	2
Harriet29082012071801	895.0	PW	right	2	S	P	2	2
Hereslookinatyou	896.0	PW	left	2	S	P	3	4
I85BL	897.0	PW	left	2	S	P	1	4
I85BL	897.0	PW	right	2	S	P	2	4
images	898.0	PW	right	2	T	P	2	2
IMG_0025-1	899.0	PW	left	2	T	P	3	2
IMG_0025-1	899.0	PW	right	2	T	P	2	2
IMG_0032-1	900.0	PW	left	2	T	P	2	1
IMG_0032x	901.0	PW	left	1	T	P	1	2
IMG_0165	902.0	PW	right	2	T	P	1	2
IMG_0250	903.0	PW	left	2	T	P	3	1
IMG_0250	903.0	PW	right	2	T	P	2	1
IMG_0443-1	904.0	PW	left	2	T	P	1	1
IMG_0532	905.0	PW	right	2	T	P	1	2
IMG_0795	906.0	PW	left	2	T	P	2	3
IMG_0795	906.0	PW	right	2	T	P	2	3
IMG_0866	907.0	PW	left	0	0	0	3	0
IMG_0866	907.0	PW	right	0	0	0	3	0
IMG_0891	908.0	PW	left	2	T	P	1	2
IMG_0891	908.0	PW	right	2	T	P	2	2
IMG_0952-1	909.0	PW	left	2	T	P	1	2
IMG_0952-1	909.0	PW	right	2	T	P	1	2
IMG_1359	910.0	PW	left	2	T	P	2	1
IMG_1359	910.0	PW	right	2	T	P	1	1
IMG_1377	911.0	PW	left	2	T	P	1	3
IMG_1377	911.0	PW	right	2	T	P	1	3
IMG_1417	912.0	PW	left	2	T	P	1	2
IMG_1417	912.0	PW	right	2	T	P	3	2
IMG_1598_zps1cad0a64	913.0	PW	left	2	T	P	2	2
IMG_1598_zps1cad0a64	913.0	PW	right	2	T	P	3	2
IMG_1617cropadj	914.0	PW	right	1	F	G	3	2
IMG_1617cropadj	914.0	PW	left	1	T	P	2	1
IMG_1628	915.0	PW	left	2	S	P	2	2
IMG_1800	916.0	PW	left	2	T	P	1	3
IMG_1800	916.0	PW	right	2	T	P	1	3
IMG_1870cropadj	917.0	PW	left	2	T	P	2	3
IMG_1870cropadj	917.0	PW	right	2	T	P	1	3
IMG_2084	918.0	PW	left	2	S	P	2	4
IMG_2442_zpsb7f4f703	919.0	PW	right	1	0	0	3	0
IMG_2442_zpsb7f4f703	919.0	PW	left	1	T	P	2	1
IMG_2449_zps967c967a	920.0	PW	left	2	T	P	2	2
IMG_2449_zps967c967a	920.0	PW	right	2	T	P	2	2
IMG_3045	921.0	PW	left	2	T	P	3	1
IMG_3045	921.0	PW	right	2	T	P	1	1
img_3448 copy_preview	922.0	PW	right	2	T	P	3	1
IMG_3661	923.0	PW	left	2	T	P	3	1
IMG_3810	924.0	PW	left	2	T	P	1	1
IMG_3909	925.0	PW	left	2	T	P	2	1
IMG_3909	925.0	PW	right	2	T	P	3	1
IMG_4317(avithera)	926.0	PW	left	1	T	P	1	1
IMG_4684-copy-Osprey-Landin	927.0	PW	left	0	0	0	3	0
IMG_4684-copy-Osprey-Landin	927.0	PW	right	0	0	0	3	0
IMG_4952	928.0	PW	left	2	T	P	1	2
IMG_4952	928.0	PW	right	2	T	P	1	2
IMG_5493	929.0	PW	left	2	T	P	2	2
IMG_5493	929.0	PW	right	2	T	P	2	2
IMG_5600	930.0	PW	left	0	0	0	1	0
IMG_5600	930.0	PW	right	0	0	0	1	0
IMG_6022	931.0	PW	left	2	S	P	3	4
IMG_6308	932.0	PW	left	2	T	P	2	3
IMG_6547_edited-1	933.0	PW	left	2	T	P	3	1
IMG_6604	934.0	PW	left	2	T	P	1	1
IMG_6604	934.0	PW	right	2	T	P	2	1
IMG_6699	935.0	PW	left	2	S	P	1	2
IMG_6699	935.0	PW	right	2	S	P	1	2
IMG_7446	936.0	PW	left	2	T	P	1	2
IMG_7446	936.0	PW	right	2	T	P	1	2
IMG_7540	937.0	PW	right	1	F	G	3	1
IMG_7540	937.0	PW	left	1	T	P	1	2
IMG_7600	938.0	PW	left	2	T	P	1	4
IMG_7600	938.0	PW	right	2	T	P	1	4
IMG_7653	939.0	PW	right	1	0	0	1	0
IMG_8013	940.0	PW	left	2	T	P	2	1
IMG_8013	940.0	PW	right	2	T	P	2	1
IMG_8166-1	941.0	PW	left	2	T	P	1	2
IMG_8166-1	941.0	PW	right	2	T	P	3	2
IMG_8231	942.0	PW	left	2	T	P	2	2
IMG_8258	943.0	PW	left	2	T	P	1	2
IMG_8563	944.0	PW	right	2	T	P	1	3
IMG_8964	945.0	PW	left	1	T	P	2	2
IMG_9093	946.0	PW	left	2	T	P	2	1
IMG_9093	946.0	PW	right	2	T	P	2	1
IMG_9351	947.0	PW	left	2	T	P	1	1
IMG_9351	947.0	PW	right	2	T	P	2	1
IMG_9941	948.0	PW	right	2	S	P	1	2
IMG_0035600x450	949.0	PW	left	2	T	P	2	1
IMG_0035600x450	949.0	PW	right	2	T	P	2	1
IrisandMiles_zps332c1d93	950.0	PW	left	1	O	G	1	3
jukka3.hv_-264x350	951.0	PW	left	1	T	P	2	2
karmstrongsamples2	952.0	PW	left	1	0	0	3	0
karmstrongsamples2	952.0	PW	right	1	O	G	1	1
landing	953.0	PW	left	2	T	P	3	1
lighthouse145	954.0	PW	left	2	T	P	2	1
lighthouse145	954.0	PW	right	2	T	P	2	1
Limpkin_RWD2	955.0	PW	left	2	T	P	2	2
Limpkin_RWD2	955.0	PW	right	2	T	P	2	2
Louise-Darby-Steading-Osprey	956.0	PW	left	2	T	P	1	2
Louise-Darby-Steading-Osprey	956.0	PW	right	2	T	P	3	2
Male-osprey-drying-wings-after-bathing	957.0	PW	left	2	T	P	2	3
Male-osprey-drying-wings-after-bathing	957.0	PW	right	2	T	P	2	3
medium_Balbuzard_Patriarch	958.0	PW	left	2	T	P	3	1
mike2001	959.0	PW	left	2	S	P	1	4
mike2001	959.0	PW	right	2	S	P	1	4
MJE_1124	960.0	PW	left	2	S	P	3	1
MJE_4997	961.0	PW	left	2	S	P	2	3
MJE_4997	961.0	PW	right	2	S	P	1	3
MJE_9980	962.0	PW	left	2	T	P	2	2
MJE_9995	963.0	PW	left	2	T	P	1	2
MJE_9995	963.0	PW	right	2	T	P	1	2
newflickr2	964.0	PW	left	2	S	P	1	1
onest	965.0	PW	left	2	T	P	1	3
onest	965.0	PW	right	2	T	P	1	3
onest2	966.0	PW	left	2	T	P	2	3
onest2	966.0	PW	right	2	T	P	2	3
onest3	967.0	PW	left	2	T	P	1	2
Oscarfirstpose11-11-07	968.0	PW	left	2	S	P	1	1
Oscarfirstpose11-11-07	968.0	PW	right	2	S	P	1	1
Osprey (1)(2)	969.0	PW	left	2	T	P	1	1
Osprey (1)(2)	969.0	PW	right	2	T	P	1	1
Osprey (1)	970.0	PW	left	2	S	P	2	4
Osprey (2)	971.0	PW	left	2	S	P	1	3
osprey (3)	972.0	PW	left	2	T	P	1	2
osprey (3)	972.0	PW	right	2	T	P	1	2
osprey (4)	973.0	PW	left	2	T	P	2	2
osprey (4)	973.0	PW	right	2	T	P	1	2
osprey 2	974.0	PW	left	2	S	P	1	3
osprey 2	974.0	PW	right	2	S	P	1	3
Osprey Ready for Flight	975.0	PW	left	2	T	P	2	1
Osprey Ready for Flight	975.0	PW	right	2	T	P	1	1
osprey(3)	976.0	PW	left	2	T	P	1	2
osprey(3)	976.0	PW	right	2	T	P	2	2
osprey(9)	977.0	PW	left	1	T	P	1	2
osprey(10x50)	978.0	PW	left	1	T	P	1	1
Osprey(22)	979.0	PW	left	2	T	P	1	1
Osprey(22)	979.0	PW	right	2	T	P	3	1
OSPREY	980.0	PW	left	2	T	P	2	1
OSPREY	980.0	PW	right	2	T	P	1	1
OSPREY1	981.0	PW	left	2	T	P	2	3
OSPREY1	981.0	PW	right	2	T	P	2	3
osprey2	982.0	PW	left	2	T	P	2	1
osprey2	982.0	PW	right	2	T	P	3	1
Osprey2-1	983.0	PW	left	2	T	P	1	1
Osprey2-1	983.0	PW	right	2	T	P	3	1
osprey-3-13-2008_0165copy(tonypratt)	984.0	PW	right	1	0	0	2	0
osprey-3-13-2008_0165copy(tonypratt)	984.0	PW	left	1	S	P	1	3
Osprey4	985.0	PW	left	2	T	P	3	3
Osprey4	985.0	PW	right	2	T	P	2	3
osprey-4-25-2008_042508_4962(tonypratt)	986.0	PW	left	2	T	P	1	2
osprey-4-25-2008_042508_4962(tonypratt)	986.0	PW	right	2	T	P	1	2
osprey6 (2)	987.0	PW	left	2	S	P	3	2
osprey6 (2)	987.0	PW	right	2	S	P	1	2
osprey6	988.0	PW	left	2	S	P	1	2
osprey6	988.0	PW	right	2	S	P	2	2
osprey6_ilawill_clarence-river_jan-2012	989.0	PW	right	1	T	P	1	3
Osprey6st	990.0	PW	left	2	T	P	2	2
Osprey6st	990.0	PW	right	2	T	P	1	2
osprey7	991.0	PW	left	2	S	P	1	1
osprey7	991.0	PW	right	2	S	P	2	1
osprey8 (2)	992.0	PW	right	2	S	P	2	2
osprey8 (3)	993.0	PW	left	2	T	P	3	2
osprey8 (3)	993.0	PW	right	2	T	P	2	2
Osprey10(2)	995.0	PW	left	2	T	P	1	1
Osprey10(2)	995.0	PW	right	2	T	P	3	1
osprey-10	996.0	PW	left	2	T	P	2	2
osprey-10	996.0	PW	right	2	T	P	3	2
Osprey12(2)	997.0	PW	left	2	T	P	1	3
Osprey12(2)	997.0	PW	right	2	T	P	1	3
osprey14	998.0	PW	left	2	S	P	2	1
osprey14	998.0	PW	right	2	S	P	1	1
osprey21	999.0	PW	left	2	S	P	1	4
osprey21	999.0	PW	right	2	S	P	1	4
osprey22	1000.0	PW	left	2	T	P	1	3
osprey22	1000.0	PW	right	2	T	P	1	3
osprey23	1001.0	PW	left	2	T	P	2	4
osprey23	1001.0	PW	right	2	T	P	1	4
osprey-27-fla-DSC_2747	1002.0	PW	left	2	T	P	3	3
osprey-27-fla-DSC_2747	1002.0	PW	right	2	T	P	2	3
osprey-87-fla-DSC_2964	1003.0	PW	left	2	T	P	1	3
Osprey157	1004.0	PW	left	2	S	P	1	3
Osprey157	1004.0	PW	right	2	S	P	1	3
Osprey800w	1005.0	PW	left	1	T	P	1	1
Osprey1500(wildbeat)	1006.0	PW	left	2	S	P	1	2
Osprey1500(wildbeat)	1006.0	PW	right	2	S	P	2	2
Osprey-7119-Edit	1007.0	PW	right	1	T	P	3	1
osprey-and-crow	1008.0	PW	left	2	T	P	1	1
osprey-and-crow	1008.0	PW	right	2	T	P	1	1
OspreyArporaGoa2008-11-21_02-19--1(northwalesbirding)	1009.0	PW	left	2	T	P	2	1
OspreyArporaGoa2008-11-21_02-19--1(northwalesbirding)	1009.0	PW	right	2	T	P	1	1
OspreyArporaGoa2008-11-21_02-23--1(northwalesbirding)	1010.0	PW	left	2	T	P	2	1
OspreyatCottageLake042911	1011.0	PW	left	2	T	P	1	1
Ospreybobbing	1012.0	PW	left	2	T	P	3	2
Ospreybobbing	1012.0	PW	right	2	T	P	3	2
Ospreychick002A	1013.0	PW	left	2	T	P	2	2
Ospreychick002A	1013.0	PW	right	2	T	P	2	2
osprey-claw-raised	1014.0	PW	left	1	0	0	1	0
osprey-claw-raised	1014.0	PW	right	1	T	P	1	2
osprey-finland-copy	1015.0	PW	left	2	S	P	1	2
osprey-finland-copy	1015.0	PW	right	2	S	P	3	2
Ospreyj	1016.0	PW	left	1	0	0	3	0
Ospreyj	1016.0	PW	right	1	T	P	1	1
OspreyJuvenile(avainweb)	1017.0	PW	left	2	T	P	2	1
OspreyJuvenile(avainweb)	1017.0	PW	right	2	T	P	2	1
OspreyontheLookout	1018.0	PW	left	1	T	P	1	3
osprey-perched (2)	1019.0	PW	left	2	T	P	1	2
osprey-perched (2)	1019.0	PW	right	2	T	P	1	2
osprey-perched	1020.0	PW	left	2	T	P	2	1
Osprey-perched-showing-talons	1021.0	PW	left	2	T	P	2	2
Osprey-perched-showing-talons	1021.0	PW	right	2	T	P	2	2
Ospreysent	1022.0	PW	right	1	0	0	1	0
Ospreysent	1022.0	PW	left	1	T	P	2	2
Ospreysentgreenmark	1023.0	PW	left	2	T	P	1	1
Osprey-SJWS-2-16-13_zps31b4109e	1024.0	PW	left	2	S	P	2	3
Ospreytakingoff	1025.0	PW	left	2	S	P	1	4
OspreyTwinIslands8-6-04	1026.0	PW	left	2	T	P	1	2
OspreyTwinIslands8-6-04	1026.0	PW	right	2	T	P	2	2
osprey-viera-6(scottmartin)	1027.0	PW	left	2	T	P	2	1
osprey-viera-6(scottmartin)	1027.0	PW	right	2	T	P	2	1
OspreyZuariRiverGoa2008-11-22_05-04(northwalesbirding)	1028.0	PW	left	2	T	P	1	4
OverexposedDSC_0216	1029.0	PW	left	1	T	P	3	1
OverexposedDSC_0216	1030.0	PW	left	1	T	P	3	2
P1020049	1031.0	PW	left	2	T	P	2	1
P1020049	1031.0	PW	right	2	T	P	1	1
P1040475	1032.0	PW	left	1	S	P	1	2
P1150141	1033.0	PW	left	1	T	P	1	3
P5074851LR	1034.0	PW	right	1	T	P	1	1
P5074929LR	1035.0	PW	left	2	S	P	2	3
P5074929LR	1035.0	PW	right	2	S	P	3	3
P5185328LR	1036.0	PW	left	2	S	P	1	2
P5185328LR	1036.0	PW	right	2	S	P	1	2
PA090014a	1037.0	PW	left	2	S	P	1	4
Pandion_haliaetus_NBII	1038.0	PW	left	2	T	P	2	2
Pandion_haliaetus_NBII	1038.0	PW	right	2	T	P	1	2
Pandion_haliaetus_-Sanibel_Island,_Florida,_USA_-feet-8	1039.0	PW	left	2	T	P	1	2
Pandion_haliaetus_-Sanibel_Island,_Florida,_USA_-feet-8	1039.0	PW	right	2	T	P	2	2
Pandion-haliaetus (1)	1040.0	PW	right	2	T	P	3	1
Pandion-haliaetus	1041.0	PW	right	2	T	P	2	3
Parcours-4S	1042.0	PW	left	2	T	P	1	2
Parcours-4S	1042.0	PW	right	2	T	P	3	2
PB200863dsampbcrre_zps9b38ae40	1043.0	PW	left	2	S	P	1	1
PB200863dsampbcrre_zps9b38ae40	1043.0	PW	right	2	S	P	2	1
Perching Osprey	1044.0	PW	right	2	T	P	1	2
p-files-313233-75	1045.0	PW	left	2	S	P	1	2
p-files-313233-75	1045.0	PW	right	2	S	P	1	2
photos999-0390-balbuzard-pecheur-Saint-Quentin-78_DxO	1046.0	PW	left	2	T	P	1	2
photos999-0390-balbuzard-pecheur-Saint-Quentin-78_DxO	1046.0	PW	right	2	T	P	1	2
photos999-0718-balbuzard-pecheur-Saint-Quentin-78_DxO	1047.0	PW	left	2	T	P	1	1
photos999-0718-balbuzard-pecheur-Saint-Quentin-78_DxO	1047.0	PW	right	2	T	P	3	1
phpThumb_generated_thumbnailjpg (1)	1048.0	PW	left	2	T	P	2	1
phpThumb_generated_thumbnailjpg (1)	1048.0	PW	right	2	T	P	1	1
PIC0115	1049.0	PW	left	2	T	P	1	2
PIC0115	1049.0	PW	right	2	T	P	1	2
Pp17-47	1050.0	PW	right	1	F	G	3	1
Pp17-47	1050.0	PW	left	1	S	P	2	4
qb178	1051.0	PW	right	1	F	G	1	2
qb178	1051.0	PW	left	1	T	P	3	2
ringedosprey	1052.0	PW	left	1	T	P	1	2
sbirdhawkosprey2	1053.0	PW	left	2	T	P	3	2
sbirdhawkosprey2	1053.0	PW	right	2	T	P	3	2
SG1L0243	1054.0	PW	left	2	T	P	1	2
SG1L0243	1054.0	PW	right	2	T	P	3	2
talons 2(wicwaslake)	1055.0	PW	left	2	T	P	3	1
talons 2(wicwaslake)	1055.0	PW	right	2	T	P	1	1
TRSP120_zpsb00a9250	1056.0	PW	left	2	T	P	3	3
TRSP120_zpsb00a9250	1056.0	PW	right	2	T	P	3	3
VirginiaBeach287	1057.0	PW	left	1	T	P	1	2
Visarend3-1	1058.0	PW	right	2	S	P	1	2
Visarend3-1	1058.0	PW	left	2	S	P	2	3
vw2	1059.0	PW	left	2	S	P	2	3
vw2	1059.0	PW	right	2	S	P	2	3
wetospreyintheevergladesjohnnyvilla	1060.0	PW	left	1	T	P	3	2
Z8320312-Osprey-SPL	1061.0	PW	left	2	T	P	3	1
Z8320312-Osprey-SPL	1061.0	PW	right	2	T	P	1	1
zz(wicwaslake)	1062.0	PW	left	2	T	P	1	1
zz(wicwaslake)	1062.0	PW	right	2	T	P	3	1
_DSC4140_cropped	1063.0	PC	left	0	0	0	1	0
_DSC4140_cropped	1063.0	PC	right	0	0	0	1	0
9-1515693-osprey_fct1001x616x9x9_t460	1064.0	PC	left	0	0	0	3	0
9-1515693-osprey_fct1001x616x9x9_t460	1064.0	PC	right	0	0	0	3	0
90	1065.0	PC	left	0	0	0	3	0
90	1065.0	PC	right	0	0	0	3	0
742	1066.0	PC	left	0	0	0	3	0
742	1066.0	PC	right	0	0	0	3	0
742	1067.0	PC	left	0	0	0	3	0
742	1067.0	PC	right	0	0	0	3	0
3872	1068.0	PC	left	0	0	0	3	0
274446_orig	1069.0	PC	left	0	0	0	3	0
274446_orig	1069.0	PC	right	0	0	0	3	0
445604_orig	1070.0	PC	left	0	0	0	3	0
445604_orig	1070.0	PC	right	0	0	0	3	0
528224_1	1071.0	PC	left	0	0	0	3	0
528224_1	1071.0	PC	right	0	0	0	3	0
662162_orig	1072.0	PC	left	0	0	0	3	0
662162_orig	1072.0	PC	right	0	0	0	3	0
1019536_orig	1073.0	PC	left	1	0	0	3	0
1019536_orig	1073.0	PC	right	1	F	G	3	1
2332891_orig	1074.0	PC	left	0	0	0	3	0
2332891_orig	1074.0	PC	right	0	0	0	3	0
3459588_orig	1075.0	PC	left	0	0	0	3	0
3459588_orig	1075.0	PC	right	0	0	0	3	0
3948103_orig	1076.0	PC	left	0	0	0	3	0
3948103_orig	1076.0	PC	right	0	0	0	3	0
4108007_orig	1077.0	PC	left	0	0	0	3	0
4108007_orig	1077.0	PC	right	0	0	0	3	0
4311895_orig	1078.0	PC	right	1	0	0	3	0
4989211_orig	1079.0	PC	left	0	0	0	3	0
4989211_orig	1079.0	PC	right	0	0	0	3	0
7014564_orig	1080.0	PC	left	0	0	0	3	0
7014564_orig	1080.0	PC	right	0	0	0	3	0
8558532_orig	1081.0	PC	left	0	0	0	3	0
8558532_orig	1081.0	PC	right	0	0	0	3	0
17407081-md	1082.0	PC	left	0	0	0	3	0
17407081-md	1082.0	PC	right	0	0	0	3	0
134028730	1083.0	PC	left	1	O	G	3	1
134028730	1083.0	PC	right	1	O	G	1	1
3451099977_a1530f2087	1084.0	PC	left	0	0	0	1	0
3451099977_a1530f2087	1084.0	PC	right	0	0	0	3	0
4483044956_75ce6c09d1	1085.0	PC	left	2	O	G	3	1
4483044956_75ce6c09d1	1085.0	PC	right	2	O	G	3	1
4483044956_75ce6c09d1	1086.0	PC	right	1	0	0	3	0
4483045052_eaf6961ef8_z	1087.0	PC	right	1	O	G	3	1
4483045052_eaf6961ef8_z	1088.0	PC	right	2	O	G	3	1
4523843417_abc4285feb	1089.0	PC	left	0	0	0	3	0
4523843417_abc4285feb	1089.0	PC	right	0	0	0	3	0
8355464935_7e9c656c83_z	1090.0	PC	right	0	0	0	3	0
8705426494_9e82c1bdec_z	1091.0	PC	left	0	0	0	3	0
8705426494_9e82c1bdec_z	1091.0	PC	right	0	0	0	3	0
9428720118_f9c730b444_b	1092.0	PC	left	0	0	0	3	0
9428720118_f9c730b444_b	1092.0	PC	right	0	0	0	3	0
A07_9765	1093.0	PC	left	0	0	0	3	0
A07_9765	1093.0	PC	right	0	0	0	3	0
AA107123_dyfi_ospreys_andyrouse	1094.0	PC	left	0	0	0	3	0
AA107123_dyfi_ospreys_andyrouse	1094.0	PC	right	0	0	0	3	0
Alewife-Birds_012-600x432	1095.0	PC	left	0	0	0	3	0
Alewife-Birds_012-600x432	1095.0	PC	right	0	0	0	3	0
Ann82305045A	1096.0	PC	left	0	0	0	3	0
aP6046218_zpsc3d77a7f	1097.0	PC	right	0	0	0	3	0
BCospreynestpair5	1098.0	PC	left	0	0	0	3	0
BCospreynestpair5	1098.0	PC	right	0	0	0	1	0
D3D_7226	1099.0	PC	left	0	0	0	3	0
DinnerTime	1100.0	PC	left	1	0	0	1	0
download	1101.0	PC	left	0	0	0	3	0
download	1101.0	PC	right	0	0	0	3	0
DPP_0008	1102.0	PC	right	1	0	0	1	0
DPP_0419	1103.0	PC	left	0	0	0	3	0
DPP_0419	1103.0	PC	right	0	0	0	3	0
dsc_0175	1104.0	PC	left	0	0	0	3	0
dsc_0175	1104.0	PC	right	0	0	0	3	0
dsc_1365	1105.0	PC	left	0	0	0	3	0
dsc_1365	1105.0	PC	right	0	0	0	3	0
dsc_8969-edit(birdlight)	1106.0	PC	left	0	0	0	3	0
dsc_8969-edit(birdlight)	1106.0	PC	right	0	0	0	3	0
DSC_68353_zpsa5cc27c9	1107.0	PC	left	2	F	G	3	2
DSC_68353_zpsa5cc27c9	1107.0	PC	right	2	F	G	3	2
dsc0255-1-4-13-13	1108.0	PC	left	0	0	0	3	0
dsc0255-1-4-13-13	1108.0	PC	right	0	0	0	3	0
dsc0255-1-4-13-13	1109.0	PC	left	2	S	P	3	1
dsc0259-1-4-13-13	1110.0	PC	left	0	0	0	3	0
dsc0259-1-4-13-13	1110.0	PC	right	0	0	0	3	0
dsc0259-1-4-13-13	1111.0	PC	left	0	0	0	1	0
dsc0259-1-4-13-13	1111.0	PC	right	0	0	0	1	0
e4b13b1a085472a1ddcabb4a157c607e	1112.0	PC	left	0	0	0	3	0
e4b13b1a085472a1ddcabb4a157c607e	1112.0	PC	right	0	0	0	3	0
eagle-fight-2	1113.0	PC	left	0	0	0	3	0
eagle-fight-2	1113.0	PC	right	0	0	0	3	0
Falcon	1114.0	PC	left	0	0	0	3	0
Falcon	1114.0	PC	right	0	0	0	3	0
Female osprey coming in for landing.Copyright Margaret O'Brien 2013_MG_4696_2-2 (2)	1115.0	PC	left	0	0	0	3	0
Female osprey coming in for landing.Copyright Margaret O'Brien 2013_MG_4696_2-2 (2)	1115.0	PC	right	0	0	0	3	0
file-162	1116.0	PC	left	0	0	0	1	0
file-162	1116.0	PC	right	0	0	0	3	0
File0198	1117.0	PC	right	1	0	0	3	0
File0198	1117.0	PC	left	1	F	G	3	1
Film25b	1118.0	PC	left	0	0	0	3	0
Film25b	1118.0	PC	right	0	0	0	3	0
fledging_osprey_coming_in_land_by_david_osborn600_400	1119.0	PC	left	0	0	0	3	0
fledging_osprey_coming_in_land_by_david_osborn600_400	1119.0	PC	right	0	0	0	3	0
GrandFalls097_zps51839b09	1120.0	PC	left	1	0	0	1	0
GrandFalls097_zps51839b09	1120.0	PC	right	1	F	G	1	1
image_56060713213048825501	1121.0	PC	left	0	0	0	3	0
image_56060713213048825501	1121.0	PC	right	0	0	0	3	0
Image00002	1122.0	PC	left	1	0	0	3	0
Image00002	1122.0	PC	right	1	F	G	3	2
IMG_1286	1123.0	PC	left	0	0	0	3	0
IMG_1286	1123.0	PC	right	0	0	0	3	0
IMG_4712_2	1124.0	PC	left	0	0	0	3	0
IMG_4712_2	1124.0	PC	right	0	0	0	3	0
IMG_5445-copy-Osprey-flying	1125.0	PC	left	0	0	0	1	0
IMG_5445-copy-Osprey-flying	1125.0	PC	right	0	0	0	2	0
IMG_7376-01	1126.0	PC	left	0	0	0	1	0
IMG_7376-01	1126.0	PC	right	0	0	0	3	0
IMG_7415	1127.0	PC	right	1	0	0	3	0
IMG_7556-01	1128.0	PC	left	0	0	0	3	0
IMG_7556-01	1128.0	PC	right	0	0	0	3	0
IMG_7606	1129.0	PC	left	0	0	0	3	0
IMG_7606	1129.0	PC	right	0	0	0	3	0
jtd100124-9417-tamagnadarr	1130.0	PC	left	0	0	0	3	0
jtd100124-9417-tamagnadarr	1130.0	PC	right	0	0	0	3	0
jump-on_zps05b99f1d	1131.0	PC	left	0	0	0	3	0
jump-on_zps05b99f1d	1131.0	PC	right	0	0	0	3	0
Juv-Osprey	1132.0	PC	left	0	0	0	1	0
Juv-Osprey	1132.0	PC	right	0	0	0	3	0
MarchValley3012	1133.0	PC	left	0	0	0	3	0
MarchValley3012	1133.0	PC	right	0	0	0	1	0
MJE_9906	1134.0	PC	left	0	0	0	3	0
MJE_9906	1134.0	PC	right	0	0	0	3	0
n501692838_672244_6986	1135.0	PC	left	2	F	G	3	1
natgeocontest32	1136.0	PC	left	0	0	0	3	0
natgeocontest32	1136.0	PC	right	0	0	0	3	0
ospbchwings2-1-1	1137.0	PC	left	1	0	0	3	0
ospbchwings2-1-1	1137.0	PC	right	1	F	G	3	2
osprey(4)	1138.0	PC	left	2	S	P	1	4
osprey(4)	1138.0	PC	right	2	S	P	1	4
osprey(14)	1139.0	PC	left	1	0	0	2	0
osprey(14)	1139.0	PC	right	1	F	G	3	2
Osprey(17)	1140.0	PC	right	1	0	0	1	0
Osprey(17)	1140.0	PC	left	1	F	G	3	2
osprey_3(outdoorlife)	1141.0	PC	left	0	0	0	3	0
osprey_3(outdoorlife)	1141.0	PC	right	0	0	0	3	0
osprey_4	1142.0	PC	left	0	0	0	3	0
osprey_4	1142.0	PC	right	0	0	0	3	0
Osprey_6	1143.0	PC	left	0	0	0	3	0
Osprey_6	1143.0	PC	right	0	0	0	3	0
osprey_8	1144.0	PC	right	1	0	0	1	0
osprey_8	1144.0	PC	left	1	F	G	3	1
osprey_13(outdoorlife)	1145.0	PC	left	0	0	0	3	0
osprey_13(outdoorlife)	1145.0	PC	right	0	0	0	3	0
Osprey_Courtship1_Thumb1	1146.0	PC	left	0	0	0	3	0
Osprey_Courtship1_Thumb1	1146.0	PC	right	0	0	0	3	0
Osprey_Courtship1_Thumb1	1147.0	PC	left	0	0	0	3	0
Osprey_kurtwecker_onamission_zps8eecdd0e	1148.0	PC	left	0	0	0	3	0
Osprey_kurtwecker_onamission_zps8eecdd0e	1148.0	PC	right	0	0	0	3	0
Osprey_Pandion_haliaetus_fs	1149.0	PC	left	0	0	0	3	0
Osprey_Pandion_haliaetus_fs	1149.0	PC	right	0	0	0	3	0
osprey7	1150.0	PC	left	0	0	0	3	0
osprey7	1150.0	PC	right	0	0	0	3	0
osprey15	1151.0	PC	left	0	0	0	3	0
osprey15	1151.0	PC	right	0	0	0	3	0
OspreyattacksRastaman	1152.0	PC	left	0	0	0	3	0
OspreyattacksRastaman	1152.0	PC	right	0	0	0	3	0
osprey-building-nest	1153.0	PC	left	0	0	0	3	0
osprey-building-nest	1153.0	PC	right	0	0	0	3	0
Osprey-by-Bill-Munro	1154.0	PC	left	0	0	0	3	0
Osprey-by-Bill-Munro	1154.0	PC	right	0	0	0	3	0
osprey-claws-out-in-flight	1155.0	PC	left	0	0	0	3	0
osprey-claws-out-in-flight	1155.0	PC	right	0	0	0	3	0
ospreyfeet5	1156.0	PC	left	0	0	0	3	0
ospreyfeet5	1156.0	PC	right	0	0	0	3	0
ospreyfeet6	1157.0	PC	left	0	0	0	3	0
ospreyfeet6	1157.0	PC	right	0	0	0	3	0
ospreyfeet7	1158.0	PC	left	0	0	0	3	0
ospreyfeet7	1158.0	PC	right	0	0	0	1	0
ospreyfeet13	1159.0	PC	left	0	0	0	3	0
ospreyfeet13	1159.0	PC	right	0	0	0	3	0
ospreyfeet15	1160.0	PC	left	0	0	0	2	0
Ospreyfight	1161.0	PC	left	0	0	0	3	0
Ospreyfight	1161.0	PC	right	0	0	0	1	0
Ospreyfight	1162.0	PC	left	0	0	0	3	0
Ospreyfight	1162.0	PC	right	0	0	0	3	0
OspreyFight2_Thumb1	1163.0	PC	left	0	0	0	3	0
OspreyFight2_Thumb1	1163.0	PC	right	0	0	0	3	0
ospreyfight0003	1164.0	PC	left	0	0	0	3	0
ospreyfight0018	1165.0	PC	left	0	0	0	3	0
ospreyfight0018	1165.0	PC	right	0	0	0	3	0
Ospreyintree-closeup	1166.0	PC	left	0	0	0	3	0
Ospreyintree-closeup	1166.0	PC	right	0	0	0	3	0
Osprey-landing_rstrick_2	1169.0	PC	left	0	0	0	3	0
Osprey-landing_rstrick_2	1169.0	PC	right	0	0	0	3	0
Ospreylanding_rstrick_small	1170.0	PC	left	0	0	0	3	0
Ospreylanding_rstrick_small	1170.0	PC	right	0	0	0	3	0
OspreyLanding_small	1171.0	PC	left	0	0	0	1	0
ospreys_fight_5457_kootenaynaturephotos	1172.0	PC	left	0	0	0	3	0
ospreys_fight_5457_kootenaynaturephotos	1172.0	PC	right	0	0	0	3	0
Ospreys-fighting-over-a-nest-site	1173.0	PC	right	0	0	0	1	0
Ospreys-fighting-over-a-nest-site	1174.0	PC	left	0	0	0	3	0
Ospreys-fighting-over-a-nest-site	1174.0	PC	right	0	0	0	3	0
OspreySummer2009686	1175.0	PC	left	0	0	0	1	0
OspreySummer2009686	1175.0	PC	right	0	0	0	1	0
Osprey-swooping-with-talons-ready-while-fishing	1176.0	PC	left	0	0	0	3	0
Osprey-swooping-with-talons-ready-while-fishing	1176.0	PC	right	0	0	0	3	0
OspreyTakeOff_edited-1	1177.0	PC	left	0	0	0	3	0
OspreyTakeOff_edited-1	1177.0	PC	right	0	0	0	3	0
osprey-talons-out_9704-copy	1178.0	PC	left	0	0	0	3	0
osprey-talons-out_9704-copy	1178.0	PC	right	0	0	0	3	0
ospreywow	1179.0	PC	left	0	0	0	3	0
ospreywow	1179.0	PC	right	0	0	0	3	0
photos95-0067-balbuzard-pecheur-91_DxO	1180.0	PC	right	0	0	0	3	0
photos95-0107_4-balbuzard-pecheur-91	1181.0	PC	left	0	0	0	3	0
photos95-0107_4-balbuzard-pecheur-91	1181.0	PC	right	0	0	0	3	0
vlcsnap-2012-05-08-07h51m45s220	1182.0	PC	left	0	0	0	1	0
vlcsnap-2012-05-08-07h51m45s220	1182.0	PC	right	0	0	0	1	0
x9Osprey1_zps0c3f61ef	1183.0	PC	right	0	0	0	2	0
YoungOsprey-July7-09_001	1184.0	PC	left	0	0	0	1	0
YoungOsprey-July7-09_001	1184.0	PC	right	0	0	0	1	0
